## REVIEW

# Finding the right thermal limit: a framework to reconcile ecological, physiological and methodological aspects of $CT_{max}$ in ectotherms

Michael Ørsted\*, Lisa Bjerregaard Jørgensen\* and Johannes Overgaard‡

## ABSTRACT

Upper thermal limits ( $CT_{max}$ ) are frequently used to parameterize the fundamental niche of ectothermic animals and to infer biogeographical distribution limits under current and future climate scenarios. However, there is considerable debate associated with the methodological, ecological and physiological definitions of  $CT_{max}$ . The recent (re)introduction of the thermal death time (TDT) model has reconciled some of these issues and now offers a solid mathematical foundation to model  $CT_{max}$  by considering both intensity and duration of thermal stress. Nevertheless, the physiological origin and boundaries of this temperature–duration model remain unexplored. Supported by empirical data, we here outline a reconciling framework that integrates the TDT model, which operates at stressful temperatures, with the classic thermal performance curve (TPC) that typically describes biological functions at permissive temperatures. Further, we discuss how the TDT model is founded on a balance between disruptive and regenerative biological processes that ultimately defines a critical boundary temperature ( $T_c$ ) separating the TDT and TPC models. Collectively, this framework allows inclusion of both repair and accumulation of heat stress, and therefore also offers a consistent conceptual approach to understand the impact of high temperature under fluctuating thermal conditions. Further, this reconciling framework allows improved experimental designs to understand the physiological underpinnings and ecological consequences of ectotherm heat tolerance.

**KEY WORDS:** Critical thermal maximum, Thermal tolerance limits, Heat stress, Thermal death time, Thermal performance curve, Homeostasis, Repair,  $T_c$

## Introduction

Thermal tolerance and performance are critical in defining the fundamental niche of ectothermic animals and, consequently, limits of thermal tolerance are strong predictors of the biogeographical distribution of ectotherms (Addo-Bediako et al., 2000; Bennett et al., 2021; Buckley and Huey, 2016; Deutsch et al., 2008; Kellermann et al., 2012; Pinsky et al., 2019; Sunday et al., 2012; Sunday et al., 2019). Projected increases in average temperature as well as increases in seasonal and daily temperature variation (Easterling et al., 2000; IPCC, 2021; Rahmstorf and Coumou, 2011; Seneviratne et al., 2014) underscore the importance of reaching a consensus on how to measure and analyse thermal tolerance estimates. In this process, it is important to understand the biological

basis of thermal tolerance traits, e.g. critical thermal maximum ( $CT_{max}$ ; see Glossary), and also to recognize how these acute tolerance traits relate to more chronic thermal performance traits, e.g. optimal temperature ( $T_{opt}$ ; see Glossary). Such an understanding will ideally improve our ability to deliver relevant and consistent predictions of species' responses to climate change (Clusella-Trullas et al., 2021; Deutsch et al., 2008; Jørgensen et al., 2022; Kingsolver et al., 2013; Parmesan, 2006; Sinclair et al., 2016; Stoks et al., 2017).

There is currently little consensus on how to measure  $CT_{max}$  as this 'trait' can be determined with different endpoints, such as loss of coordination, onset of spasms, coma or death (Lutterschmidt and Hutchison, 1997a,b) and it is a source of confusion that  $CT_{max}$  is determined in assays with different time frames or heating rates, because the duration and intensity of heat exposure will invariably affect the  $CT_{max}$  estimate (Bates and Morley, 2020; Chown et al., 2009; Jørgensen et al., 2019; Kilgour and McCauley, 1986; Peck et al., 2009; Terblanche et al., 2007). An even bigger source of confusion comes from terminology, because  $CT_{max}$  is also often used to describe the upper endpoint of the thermal performance curve (TPC; see Glossary) for traits such as growth, metabolism or activity (in this Review, we define such upper limits as  $TPC_{max}$ ) (Deutsch et al., 2008; Huey and Stevenson, 1979; Kellermann and van Heerwaarden, 2019). The somewhat indiscriminate use of the term  $CT_{max}$  results in ambiguity, which is problematic for comparison of  $CT_{max}$  across large comparative meta-analyses, and when  $CT_{max}$  is used in trait-based modelling to forecast the consequences of climate change (Cooper et al., 2008; Hoffmann et al., 2003; Jørgensen et al., 2022; Kellermann and van Heerwaarden, 2019; Sunday et al., 2012; Sunday et al., 2019; Woodin et al., 2013).

Some of the methodological challenges concerning  $CT_{max}$  have recently been addressed by (re)introducing the concept of the thermal death time (TDT) model (see Glossary), which combines information on the severity and duration of stressful temperature exposure (Fry et al., 1946; Jørgensen et al., 2019; Jørgensen et al., 2021b; Kilgour and McCauley, 1986; Maynard Smith, 1957; Rezende et al., 2014). However, these temperature–time models of critical tolerance have yet to be discussed extensively in relation to model boundaries and in relation to other measures of thermal performance, such as TPCs. Further, the physiological origin of TDT models is not well described (see discussion in Jørgensen et al., 2019 and Jørgensen et al., 2021b) nor have the models been properly integrated with the historical and ongoing debate on the mechanistic causes of  $CT_{max}$  (Bowler, 2018; Cossins and Bowler, 1987; González-Tokman et al., 2020; Jutfelt et al., 2018; Neven, 2000; Pörtner and Farrell, 2008; Schulte et al., 2011; Sørensen et al., 2003; Vornanen, 2020).

With this Review, we first discuss the current state of  $CT_{max}$  measurements and propose a common framework that can reconcile and differentiate the classic TPC model with the TDT model as models capturing how temperature affects rates of 'life' and 'death', respectively. We then establish an integrative model of

Section for Zoophysiology, Department of Biology, Aarhus University, 8000 Aarhus C, Denmark.

\*Shared first authorship

‡Author for correspondence (johannes.overgaard@bio.au.dk)

© M.Ø., 0000-0001-8222-8399; L.B.J., 0000-0002-4438-4558; J.O., 0000-0002-2851-4551

## Glossary

### Critical temperature ( $T_c$ )

A species/population-specific temperature (or temperature zone) that defines the transition between the permissive and stressful temperature range.  $T_c$  is the temperature where homeostatic capacity rate and disruption rate are equal.

### Critical thermal maximum ( $CT_{max}$ )

Temperature at which locomotor function is lost during gradual heating (ramping assay). In static temperature assays,  $CT_{max}$  can be reported as the time to failure.  $CT_{max}$  therefore describes an acute heat failure that occurs at a temperature above the critical temperature ( $T_c$ ) in static and dynamic assays.

### Disruption rate

A theoretical rate describing the temperature sensitive increase in processes disrupting organismal homeostasis with increasing temperature.

### Heat failure rate

The difference between the disruption rate and the homeostatic capacity rate determines the rate at which heat stress accumulates. This rate determines the TDT relationship and can be calculated as 1/time to failure at different stressful temperatures (above  $T_c$ ).

### Homeostatic capacity rate

A theoretical rate describing the capacity of biological processes that acts to support organismal homeostasis. This rate is temperature sensitive and the associated biological processes counter biological disruption caused by increased temperature.

### Optimal temperature ( $T_{opt}$ )

The temperature at which a trait/biological rate is maximized across a range of temperatures in a thermal performance curve (TPC).

### Permissive temperature range

The temperature range that permits completion of the life cycle, i.e. development, maturation and reproduction, and where heat stress does not accumulate. This is comparable to the thermal niche breadth concept.

### Stressful temperature range

The temperature range where homeostasis is disrupted such that heat stress accumulates until it causes heat failure or mortality.

### Thermal death time (TDT) model

The TDT model describes the exponential relationship between temperature and time to heat failure. When time to heat failure is  $\log_{10}$  transformed, the TDT becomes a linear regression that is easily described by the slope (or more often  $z = -1/\text{slope}$ ) and a point on the line.

### Thermal dose (Td)

A theoretical amount of thermal injury an organism can tolerate before heat failure. Once the thermal dose is reached, the organism will fail/die.

### Thermal performance curve (TPC)

The TPC describes the relationship between temperature and biological rate of traits in ectotherms. These traits are often inferred to be fitness related and the TPC is often depicted as an asymmetric left-skewed curve.

### Temperature quotient ( $Q_{10}$ )

Quotient describing the fold-change in biological rate due to a 10°C increase in temperature.

thermal tolerance that is based on the balance between disruptive and homeostatic biological processes, providing a framework for understanding exposure to high temperature under naturally fluctuating thermal conditions, as it allows for the inclusion of repair in the assessment of cumulative heat stress. Together, this relatively simple and consistent view of critical thermal limits enables improved experimental design and a coherent understanding of animal heat tolerance in comparative, ecological and mechanistic studies.

## Thermal performance or thermal death – defining the permissive and stressful temperature range

When discussing thermal limits of ectotherms, it is important to differentiate between the temperature range that permits completion

of the life cycle, i.e. development, maturation and reproduction, and the temperatures that acutely limit the survival of the organism as a result of acute thermal stress (Fig. 1; Fry et al., 1946; Hollingsworth, 1969; Fry, 1971; Woodin et al., 2013; Kellermann and van Heerwaarden, 2019; Bates and Morley, 2020; Parratt et al., 2021; van Heerwaarden and Sgrò, 2021). Fry and colleagues (Fry, 1947; Fry, 1971; Fry et al., 1946) distinguished between these temperature domains as the ‘zone of tolerance’ and the ‘zone of resistance’, respectively. Here, we refer to these as the ‘permissive’ and ‘stressful’ temperature range, respectively (see Glossary), to avoid confusion with effects of acclimation on heat stress tolerance or resistance. An important aspect of the proposed framework is the introduction of the critical temperature ( $T_c$ ; see Glossary), which separates the permissive temperature range from the upper stressful temperature range.

## The permissive temperature range and the TPC

The effects of permissive temperatures on ectotherm performance/fitness have traditionally been described by the TPC (Fig. 1; Angilletta, 2009; Huey and Stevenson, 1979; Huey et al., 2012). As Darwinian fitness is difficult to assess directly, a proxy related to fitness is usually used instead, e.g. egg-laying capacity, developmental speed (Huey and Berrigan, 2001; Huey et al., 2012; MacLean et al., 2019; Overgaard et al., 2014) or rates of biochemical or physiological processes, such as growth rate or feeding rate (Angilletta, 2009; Cossins and Bowler, 1987; Hochachka and Somero, 2002; Schulte et al., 2011; Sinclair et al., 2016). The TPC is most often left-skewed with an initial positive effect of increasing temperature on performance (Buckley et al., 2022; Dell et al., 2011; Gilchrist, 1995). After the maximal rate of performance is reached at  $T_{opt}$ , the rate of performance quickly decreases when temperature increases further. The upper and lower endpoints of TPCs are frequently termed  $CT_{max}$  and  $CT_{min}$ , respectively, which can be confusing because the temperature limits of the TPC are not necessarily related to acute failure (Fig. 1). Thus, a complicating feature of TPCs is that the performance of some traits, e.g. speed of locomotion, oxygen consumption rate and heart rate, clearly span both the permissive and stressful temperature range, while TPCs for population growth and chronic behaviours are restricted to only the permissive temperature range. To illustrate this, we compiled estimates of thermal performance of various biological processes and acute thermal limits in three ectothermic species: vinegar fly, brook trout and zebra mussel (Fig. 1). Note that heat failure and heat knockdown are used interchangeably to describe either onset of heat coma or heat mortality (Lutterschmidt and Hutchison, 1997a,b). For all three species, the TPCs of fitness proxies and growth are restricted to the permissive temperature range and always decline to zero before the temperature reaches the stressful temperature range above  $T_c$  (Fig. 1). In contrast, TPCs for processes related to movement or metabolic rate span both the permissive and stressful temperature range such that the observed decline in these traits coincides more with the decrease in survival time conveyed by the TDT model (secondary axes in Fig. 1). The distinct nature of TPCs for different traits is partly a result of the time scales at which the performance is measured as fitness proxies of growth and reproduction inherently operate over long time frames, whereas locomotion and metabolic rate are instantaneous measures (Cossins and Bowler, 1987; Hoffmann and Todgham, 2010; Kellermann and van Heerwaarden, 2019; Kellermann et al., 2019; Kingsolver and Woods, 1997; Kingsolver and Woods, 2016; Schulte et al., 2011, 2020; Sinclair et al., 2016). Traits such as metabolic rate or movement are obviously indirectly related to Darwinian fitness and remain important and

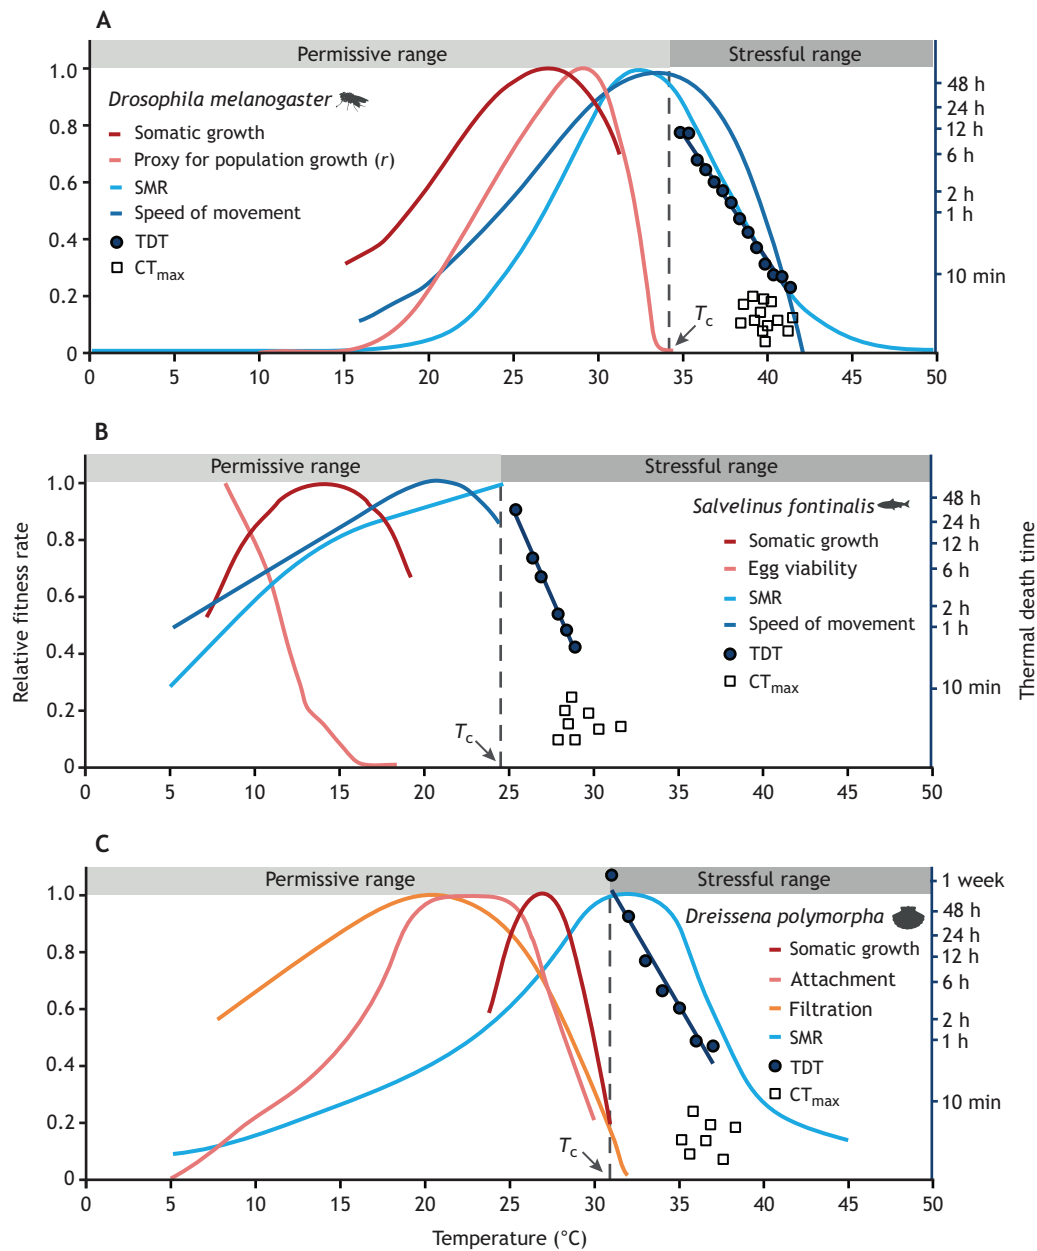

**Fig. 1. Thermal performance curves (TPCs) differ markedly between traits.** TPCs and measures of heat tolerance for (A) vinegar fly (*Drosophila melanogaster*), (B) brook trout (*Salvelinus fontinalis*) and (C) zebra mussel (*Dreissena polymorpha*). TPCs of chronic biological processes associated directly with Darwinian fitness [proxy of population growth rate ( $r$ ) and somatic growth; red shades] generally have lower thermal optima ( $T_{opt}$ ) and are restricted to the permissive temperature range, whereas those that are more indirectly associated with Darwinian fitness [speed of movement and standard metabolic rate (SMR); blue shades] span both the permissive and stressful temperature range and generally have a higher  $T_{opt}$ . Thermal death time (TDT) curves show the relationship between temperature and survival time in the stressful temperature range (dark blue circles and line refer to the secondary y-axis) along with acute measures of  $CT_{max}$  measured during dynamic (ramping) exposures (white squares separated vertically for increased visibility). A critical temperature ( $T_c$ ; dashed line) separating the permissive and stressful temperature range is tentatively placed to indicate the transition between temperature ranges determining ‘rate of life’ and ‘rate of death’. See Table S1 for references.

functional at temperatures above  $T_c$ , where they may be critical for escaping the heat stress. Even so, the optimal and critical temperature limits of these ‘indirect’ fitness traits may be confusing if their TPCs are interpreted as direct correlates of Darwinian fitness, e.g. the ‘optimal’ temperature for metabolic rate or running speed is clearly not aligned with the optimal temperature for population growth (Fig. 1).

The distinction between the permissive and stressful temperature range is also highlighted by the differential impact of temperature

on lifespan (Fig. 2). In the permissive temperature range, lifespan is not limited directly by acute thermal injury but decreases with increasing temperature simply as a consequence of the thermal effect on metabolic rate (rate-of-living hypothesis; Brown et al., 2004; Munch and Salinas, 2009; Shaw and Bercaw, 1962) or through differences in the temperature-specific ageing threshold which precedes death (described in the threshold hypothesis; Maynard Smith, 1963). Irrespective of the mechanism, the rate of ageing/senescence/mortality (calculated as the inverse of lifetime)

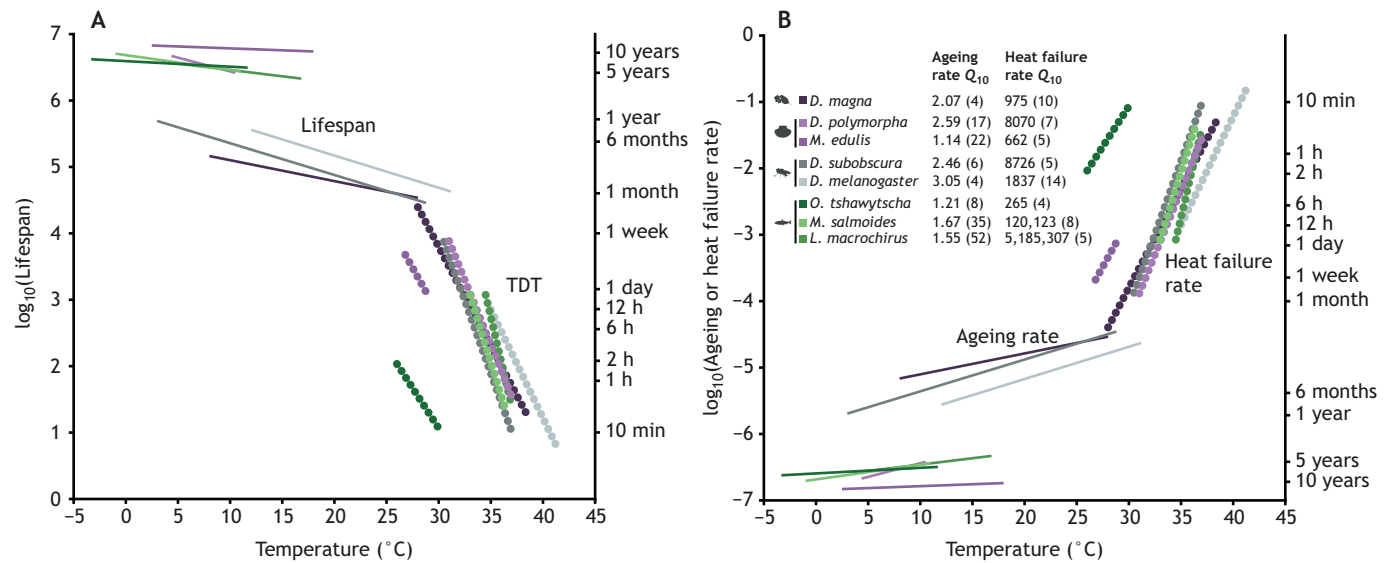

**Fig. 2. Higher thermal sensitivity of survival in the stressful temperature range compared with lifespan in the permissive range.** (A) Lifespans (min) and survival times for eight ectotherm species measured across temperatures in the permissive (solid lines) and stressful temperature range (dotted lines; TDT curves), respectively. (B) Lifespans and survival times are converted to ageing/mortality rate (permissive range) or heat failure rate (stressful range) in both cases calculated as  $1/\text{time to death}$  ( $\text{min}^{-1}$ ). Thermal sensitivity of heat failure rate in the stressful range (steepness of slope) is much more extreme than that for ageing rate in the permissive temperature range (note the logarithmic scale) as also shown in the species-specific temperature quotients,  $Q_{10}$ , reported separately for the permissive (ageing rate  $Q_{10}$ ) and stressful (heat failure rate  $Q_{10}$ ) temperature range. The number of data points used to calculate  $Q_{10}$  is indicated in parentheses. Lifespan data in the permissive temperature range were retrieved from Munch and Salinas (2009) except for *D. subobscura* (from Hollingsworth, 1969) and the references for the acute survival times (TDT) can be found in Table S2.

in the permissive temperature range has temperature quotients ( $Q_{10}$ ; see Glossary) that are typical for ‘normal’ biological processes ( $Q_{10}=1.1\text{--}3.1$ ; Fig. 2) (Dell et al., 2011; Doudoroff, 1945; Loeb and Northrop, 1916; Munch and Salinas, 2009; Seebacher et al., 2014). These  $Q_{10}$  estimates of ageing/senescence/mortality rates are in marked contrast to the very high  $Q_{10}$  values that characterize rates of heat failure conveyed in the TDT model (see below).

### The stressful temperature range and the TDT curve

In the stressful range, temperature poses an acutely limiting factor on survival and does so in a dose-dependent manner where the severity of the thermal stress dictates survival time, i.e. faster heat death at higher temperature. As exemplified in Fig. 2, the slope between temperature and survival time is much steeper in the stressful temperature range than in the permissive range. The lethal domain of high temperatures therefore only spans a few degrees before survival time becomes extremely brief (Brown and Crozier, 1927; Cossins and Bowler, 1987; Fry et al., 1946; Jørgensen et al., 2019; Jørgensen et al., 2021b; Kilgour and McCauley, 1986; Rezende et al., 2014). Consequently, in all eight species examined here,  $Q_{10}$  values for heat failure rates (see Glossary) are much higher in the stressful temperature range (median  $Q_{10}=4953$ ) compared with those for ageing rates in the permissive range (median  $Q_{10}=1.87$ ; Fig. 2). These examples are in accordance with recent and historical evidence showing that the thermal sensitivity of processes related to heat failure are characterized by extreme  $Q_{10}$  values in the range 100–100,000 (Hollingsworth, 1969; Jørgensen et al., 2019; Jørgensen et al., 2022; Maynard Smith, 1957). To put this in perspective, a  $Q_{10}$  of 1500 (close to the median  $Q_{10}$  of heat failure rate in 112 ectotherm species; Jørgensen et al., 2022) causes a  $\sim 100\%$  increase in injury rate per  $1^\circ\text{C}$  in the stressful temperature range, causing the knockdown time to be halved for each  $1^\circ\text{C}$  increase. Contrastingly, in the permissive range, where  $Q_{10}$  is  $\sim 2$ , lifespan is reduced by a modest 7% per  $1^\circ\text{C}$  increase as a result of accelerated biological activity. Importantly, the extreme

thermal sensitivity in the stressful temperature range implies that the increase in intensity and frequency of heat waves associated with global warming could greatly amplify heat mortality for many ectotherms (Jørgensen et al., 2022).

The extreme thermal sensitivity of heat failure in the stressful temperature range is conveyed by the TDT model, which describes the exponential decline in survival time with increasing temperature (Fig. 3A,B; Fry et al., 1946; Kilgour and McCauley, 1986; Rezende et al., 2014; Jørgensen et al., 2019). Although the focus here is on heat tolerance, we emphasize that the TDT model can also be applied to cold stress (Chen and Walker, 1994; Nedvď et al., 1998; Salt, 1966; Tarapacki et al., 2021).

### A critical temperature, $T_c$ , separates the permissive and stressful temperature zone

Here, we define a critical temperature ( $T_c$ ) that separates the permissive and stressful temperature domains (Fig. 1). Philosophically,  $T_c$  can also be considered as a narrow temperature range, rather than a specific temperature, where thermal relationships of the organism transition from mainly temperature effects on ‘processes supporting life’ to those on ‘processes causing injury and death’. Although it is difficult to empirically measure  $T_c$  (see ‘Concluding remarks and future perspectives’, below), this parameter is conceptually important for defining, parameterizing and reconciling measures of heat tolerance. For example, it is evident that any measure of acute heat failure will always be above  $T_c$  (Fig. 1). This definition helps separate measures of acute heat failure (often termed  $CT_{\text{max}}$ ) from the upper thermal limits of TPCs ( $TPC_{\text{max}}$ ) that must be below  $T_c$  for traits directly related to fitness and growth. The  $T_c$  concept presented in this review is largely analogous to ‘the upper incipient lethal temperature’ (UILT) defined by Fry and co-workers in their seminal studies on lethal temperatures in fish (Fry, 1947; Fry, 1971; Fry et al., 1946) or to the long-term survival temperature  $T_s$ , defined more recently by Richard et al. (2012) in

marine ectotherms. These transition temperatures (UILT,  $T_s$  or  $T_c$ ) all represent the highest temperature that allows for chronic survival, and above these transition temperatures, heat stress accumulates with increasing intensity as temperature is raised further (as in Fig. 2). Importantly, modelling studies of heat tolerance in fish (Kilgour and McCauley, 1986; Kilgour et al., 1985) and insects (Kingsolver and Umbanhowar, 2018; Jørgensen et al., 2021a,b) have all concluded that inclusion of a critical thermal limit ( $T_c$ ) is needed for models of heat stress to disregard the time spent below  $T_c$  during the gradual temperature increase in a ramping assay, as this time does not contribute to the accumulation of heat injury.

### The TDT model – a tool to reconcile static and dynamic measures of acute thermal limits (CT<sub>max</sub>)

Heat tolerance is typically measured using either static assays, where time to heat failure is measured under exposure to a constant temperature, or dynamic/ramping assays, where the heat failure temperature under incrementally increased temperature exposure is assessed. Both static and dynamic protocols have been widely discussed (Overgaard et al., 2012; Rezende et al., 2011; Terblanche et al., 2007), and in particular it is debated whether static and dynamic measures of heat tolerance are comparable or even ecologically relevant (Bak et al., 2020; Cooper et al., 2008; Kingsolver and Umbanhowar, 2018; Rezende et al., 2014; Santos et al., 2011; Sgrò et al., 2010; Terblanche et al., 2011). Much of this methodological discussion can be settled by the TDT model (Fry et al., 1946; Jørgensen et al., 2019, 2021b; Kilgour and McCauley, 1986; Maynard Smith, 1957; Rezende et al., 2014; Willot et al., 2022) and here we elaborate on this discussion by reviewing the foundation and boundaries of the TDT model.

#### Foundations of the TDT model

The TDT model is based on the understanding that heat failure rate increases exponentially with temperature (Fry et al., 1946; Jacobs, 1919; Jørgensen et al., 2019, 2021b; Kilgour and McCauley, 1986; Kilgour et al., 1985) and that, at temperatures above  $T_c$ , the animal can only withstand a finite amount of accumulated heat injury before it succumbs to heat stress, here termed ‘thermal dose’ (see Glossary; Td in Fig. 3). This thermal dose is the same for all exposure temperatures above  $T_c$  and can graphically be represented as equal area rectangles in a plot of heat failure rate versus time to heat failure (Fig. 3A). As heat failure rate increases exponentially with temperature, it is clear that time to heat failure will decrease exponentially with temperature, as depicted in the classical TDT curve (Fig. 3B; Bigelow, 1921; Fry et al., 1946; Jørgensen et al., 2021b; Kilgour and McCauley, 1986; Maynard Smith, 1957). Time to heat failure is traditionally  $\log_{10}$  transformed such that the TDT curve becomes a simple linear relationship described by the slope and a point on the line, e.g. the temperature causing heat coma after a 1 h exposure (Jørgensen et al., 2019, 2021b; Willot et al., 2022). In the TDT model, the slope represents the thermal sensitivity factor,  $z = -1/\text{slope}$ , describing the temperature change resulting in a one order of magnitude change in heat failure time (Rezende et al., 2014). TDT model parameters are typically derived from experiments where time to failure is measured under exposure to three or more static temperatures (Fig. 3B) and, once established, the TDT model can be used to estimate heat failure time at a given temperature or failure temperature for a given exposure duration.

#### High and low intensity heat stress are additive

If the thermal dose is truly independent of temperature, then the injury sustained at different static temperatures should be

completely additive as is well supported empirically (Fry, 1947, 1971; Fry et al., 1946; Jørgensen et al., 2021b; Kashmeery and Bowler, 1977). This additivity suggests that the same physiological mechanisms are responsible for heat injury sustained under both intense and moderate heat stress at temperatures above  $T_c$  (see below). Consequently, it is possible to use TDT model parameters derived from static experiments to accurately predict heat failure time during (i) combinations of different static exposures, (ii) gradually increasing temperature where a linear temperature increase results in an exponentially increasing heat failure rate and/or (iii) fluctuating temperature exposure (Fig. 3C). These predictions of heat stress additivity above  $T_c$  have, to our knowledge, only been comprehensively tested experimentally in two species – the brook trout and vinegar fly – but here the predictions have been fully validated (Fry et al., 1946; Jørgensen et al., 2021b). First, using only static exposure temperatures, TDT models were parameterized. Subsequently, the TDT parameters were used to predict time to heat failure during several static, ramping or fluctuating conditions, and these predictions were then compared with actual experimental measures of time to heat failure (Fig. 3D). As is clear from these examples, the time to heat failure during variable temperature exposures can be accurately predicted from TDT model parameters by simply integrating heat failure accumulation over time (Fry et al., 1946; Jørgensen et al., 2021b). Importantly, in these experiments, additivity was not affected by the order of exposure (high or low intensity heat first), and the stressful temperatures were always above  $T_c$ , preventing the animals from repairing thermal injury, which could occur in the permissive zone (see below). Although these two examples provide strong support for the additivity of heat stress above  $T_c$ , it remains relevant to test this prediction broadly among ectotherms.

#### Static and dynamic assays measure the same type of heat stress

A consequence of additive heat stress accumulation above  $T_c$  is that static and dynamic assay types can be reconciled by considering that both assays report the heat failure endpoint once a given amount of heat stress (the thermal dose) has accumulated (Fry et al., 1946; Jørgensen et al., 2019, 2021b; Kilgour and McCauley, 1986). In other words, the model essentially claims that all static and dynamic measures of acute CT<sub>max</sub> measure the same trait! It is simply the progression towards CT<sub>max</sub> that differs when different static and dynamic protocols expose the animal to different failure rates (Fig. 3C). Consequently, it is mathematically possible to convert one assay type to another using the parameters from a TDT model (Fig. 3C,D; Fry et al., 1946; Jørgensen et al., 2019, 2021b; Kilgour and McCauley, 1986; Kilgour et al., 1985). Further, this reconciling model can explain the frequent observation that in dynamic assays, CT<sub>max</sub> decreases with slower ramping rates, as the slower ramping invariably increases the duration of exposure to stressful temperatures above  $T_c$  (Chown et al., 2009; Jørgensen et al., 2019; Kingsolver and Umbanhowar, 2018; McMahon and Ussery, 1995; Mitchell and Hoffmann, 2010; Peck et al., 2009; Richard et al., 2012; Terblanche et al., 2007).

A TDT model can be parameterized from several static experiments (a classic TDT model) or using several dynamic assays with different temperature ramping rates (Jørgensen et al., 2021b; Kilgour and McCauley, 1986). In previous work (Jørgensen et al., 2021b), we introduced the mathematical framework and R-scripts allowing researchers to directly obtain TDT parameters enabling conversion and comparison of thermal tolerance measurements within and between static and dynamic experiments (see <https://github.com/MOersted/Thermal-tolerances>)

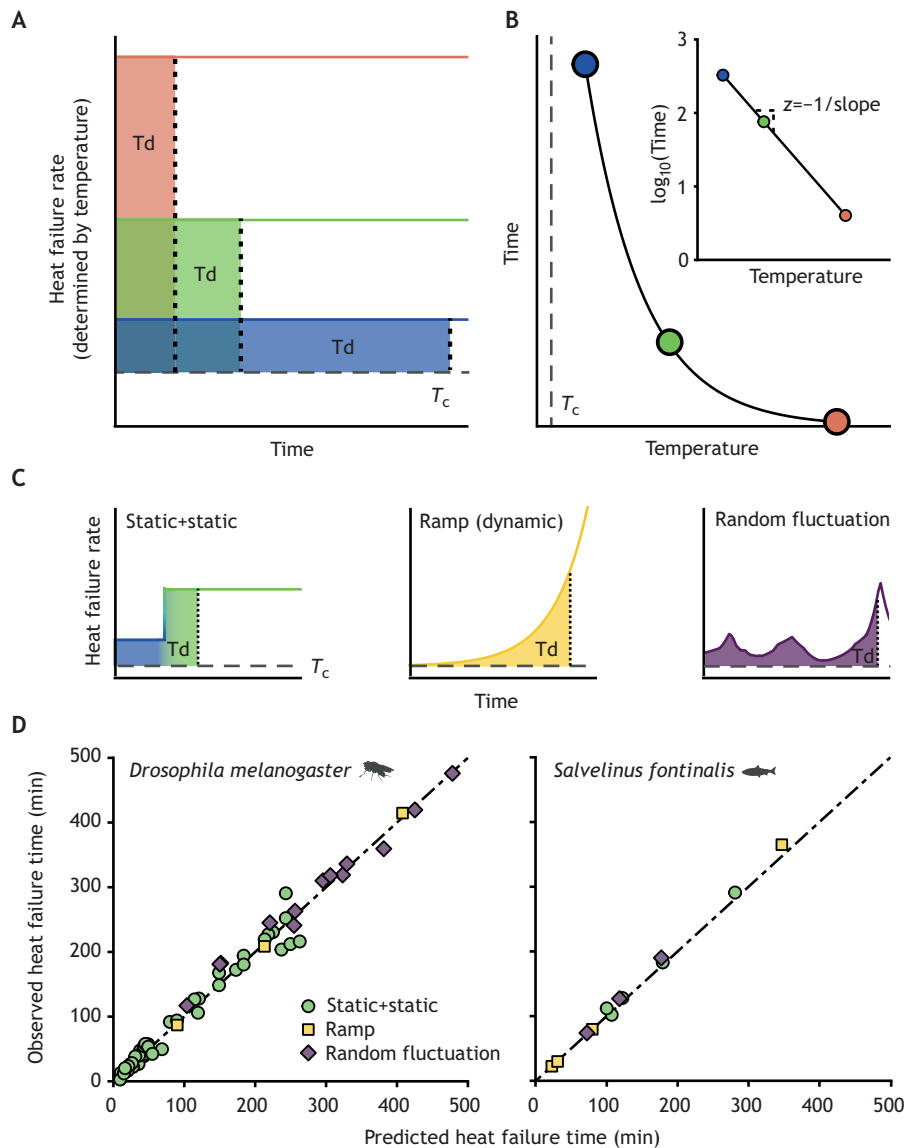

**Fig. 3. Heat failure and tolerance can be explained using the TDT model.** (A) Heat failure rate increases exponentially with temperature above the critical temperature  $T_c$  (dashed line) and heat failure (vertical dashed line) is assumed to occur once a finite amount of heat injury (indicated by the area of the rectangles) has accumulated (thermal dose, Td). Each of the equal-sized rectangles represents heat injury accrued at a specific constant temperature, i.e. with a specific rate calculated as  $1/\text{heat failure time}$ . (B) The exponential relationship between temperature and heat failure rate in A leads to the negative exponential relationship between temperature and knockdown time (note that the axes are rotated). The exponential relationship is asymptotic towards the critical temperature  $T_c$ . A TDT curve can be produced by a linear regression of temperature on  $\log_{10}$ -transformed heat failure time.  $z = -1/\text{slope}$  of this line describes the thermal sensitivity of heat failure (see Figs 1 and 2 for species examples). (C) Examples of three temperature profiles that include exposure to more than a single temperature and result in different heat failure rates during the exposure. 'Static+static' refers to a sequential exposure to two constant temperatures where heat failure rate changes abruptly after the temperature change. 'Ramp' refers to a dynamic exposure where temperature increases linearly, resulting in an exponential increase in heat failure rate. 'Random fluctuation' refers to exposure to temperatures that fluctuate above  $T_c$  and can be regarded as a series of infinitesimal exposures to different constant temperatures, each with their specific heat failure rate. For each of the exposure types, Td eliciting heat failure is assumed to be the same, as conveyed by the TDT model. (D) TDT model parameters are derived from a series of static experiments. These parameters are then used to predict heat failure time of treatments (x-axis) plotted against the observed heat failure times (y-axis) in static+static, dynamic or fluctuating temperature experiments. Here, coma (*D. melanogaster*) and death (*S. fontinalis*) are used as the endpoint of heat failure. Irrespective of the type of temperature exposure profile (displayed in C), the predicted and experimentally observed heat failure times are highly correlated, attested by the closeness to the line of unity (dashed line). A–C are modified from Jørgensen et al. (2021b) and D uses data from Jørgensen et al. (2019, 2021b) (*D. melanogaster*) and Fry et al. (1946) (*S. fontinalis*).

for scripts and guidance). Furthermore, TDT parameters can be used to investigate the accumulation of heat stress under fluctuating temperatures (Fig. 3D). However, as with all models, considering limitations is crucial. Firstly, to establish a good TDT model, we recommend using several static experiments covering temperatures that result in a wide range of experimental durations

as model extrapolation can be problematic (Jørgensen et al., 2019, 2021b). Secondly, it is important to consider the model boundaries as the TDT model is only valid at temperatures above  $T_c$  (Fig. 2; Jørgensen et al. (2021b)). Thus, TDT model parameters should never be used to assess temperature effects on thermal performance below  $T_c$  as tolerance and performance in the

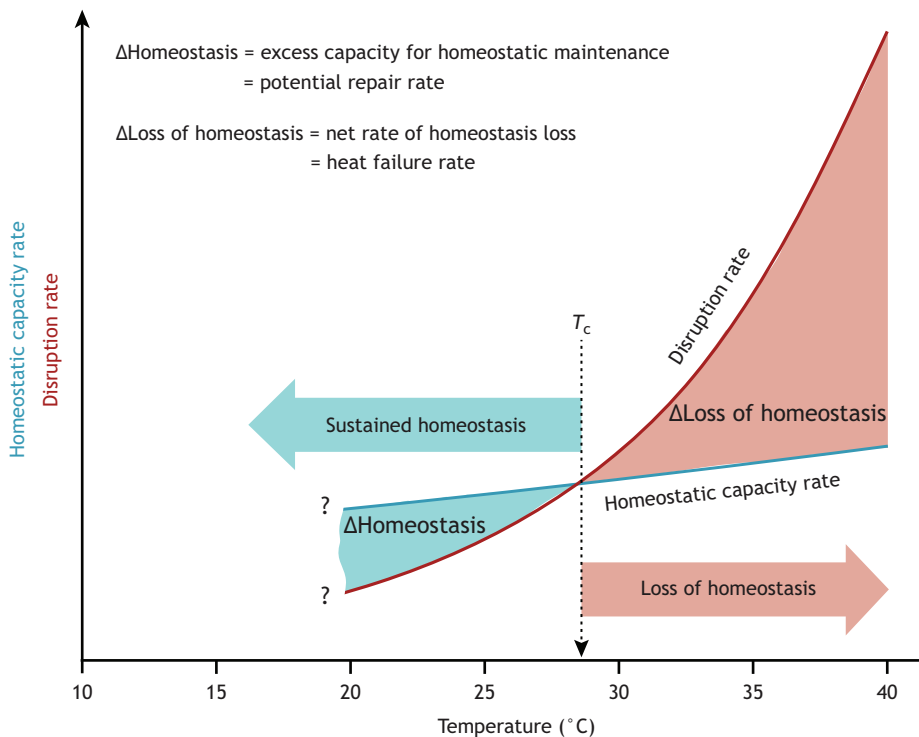

**Fig. 4. Rate of disruption is balanced by a capacity for homeostatic maintenance.** The red curve represents a theoretical rate of disruption while the blue curve represents a theoretical rate of homeostatic capacity. Below the critical temperature  $T_c$ , the homeostatic capacity surpasses the disruption rate, resulting in net sustained homeostasis, i.e. the animal is in a balanced state where disruption is mitigated and there is excess capacity for injury repair ( $\Delta$ Homeostasis, blue area). Above  $T_c$ , the rate of disruption exceeds the capacity for homeostasis and accordingly a net loss of homeostasis occurs ( $\Delta$ Loss of homeostasis, red area). The two antagonistic processes differ substantially in thermal sensitivity, which results in a very high thermal sensitivity of  $\Delta$ Loss of homeostasis above  $T_c$ . The  $\Delta$ Loss of homeostasis above  $T_c$  dictates the duration at a specific temperature required to lose homeostasis to an extent that results in organismal heat failure. A similar principle can be applied at low temperatures where ectotherms also suffer from thermal stress due to unbalanced rates of homeostatic disruption and repair (not shown).

permissive temperature range are related to biological rates of life with different thermal sensitivities (Figs 1 and 2; Jørgensen et al., 2022).

### The physiological origin and boundaries of the TDT model

Considering the additive effects of heat stress outlined above, it is reasonable to assume that a single biological disruption rate accelerating above  $T_c$  is the cause of heat failure in ectotherms or that several processes leading to heat failure converge in a common disruptive process (Bowler, 2018; Schmidt-Nielsen, 1997). Further, the extreme and unconventionally high  $Q_{10}$  of the heat failure rate is indicative of a shared mechanistic cause of heat failure in ectotherms. However, at present there is little consensus regarding the physiological causes of heat failure. Below, we discuss how heat failure probably originates from a mismatch between rates of homeostatic and disruptive biological processes.

### Balancing maintenance and loss of homeostasis

In the simplest model, the relationship between temperature and survival duration conveyed by the TDT model (Fig. 3) could be explained by a single temperature-dependent biological process that disrupts homeostasis with exponentially increasing intensity as temperature increases ('disruption rate' see Glossary; red curve in Fig. 4). However, heat injury only accumulates above a critical temperature threshold ( $T_c$ ), necessitating the inclusion of an additional temperature-dependent biological rate representing the 'capacity for homeostatic regulation' ('homeostatic capacity rate' see Glossary; blue curve in Fig. 4). Introduction of this homeostatic capacity rate establishes  $T_c$  as the temperature where the rate of disruption exactly equals the capacity for restoration of homeostasis, i.e. with no net accumulation of heat injury or repair (for a comparable discussions of repair versus failure, see Colinet et al.; 2015; Kovacevic et al., 2019). According to this view,  $T_c$  defines the permissive temperature range as the range where the homeostatic

capacity rate is greater than the disruption rate, and the stressful range as the range where the homeostatic capacity rate is less than the disruption rate (Figs 1–4). Accordingly, it is actually the net difference ( $\Delta$ Loss of homeostasis) between the rate of disruption ('injury', red curve in Fig. 4) and the rate of homeostatic capacity ('repair', blue curve in Fig. 4) that determines the exponential increase in heat failure conveyed by the TDT model.

### Repair of thermal injury at temperatures below $T_c$

A model with two antagonistic processes representing loss and re-establishment of homeostasis allows for modelling how net repair and net injury accumulation vary when ectotherms experience fluctuating temperatures (Colinet et al., 2015; Kovacevic et al., 2019; Nedvěd et al., 1998). Heat injury accumulates exponentially with temperature above  $T_c$  and even if an ectotherm survives a period above  $T_c$  and evades the stressful conditions, it will have accumulated a 'load' of heat stress (equivalent to a fraction of the thermal dose  $T_d$  illustrated in Fig. 3A). This load of heat stress is additive (see above) in subsequent stressful exposures unless homeostasis is restored during exposure to temperatures below  $T_c$ . Accordingly, heat stress accumulated during a warm day can be partially or completely repaired during a cooler night (Colinet et al., 2015; Dillon et al., 2007; Fry et al., 1946; Kovacevic et al., 2019; Speights et al., 2017).

The potential for net repair at temperatures below  $T_c$  depends on the relative strength of the antagonistic processes determining repair and disruption of homeostasis, respectively (Fig. 4). The literature on repair rates is surprisingly scarce but studies indicate that net repair rate is temperature dependent with increasing repair rates found at higher temperatures (Bowler and Kashmeery, 1979; Dingley and Maynard Smith, 1968; Iandolo and Ordal, 1966). This observation is not fully compatible with the pattern in Fig. 4, where the rate of net repair should decrease at the highest permissive temperatures (because of an increasing disruption rate) and repair

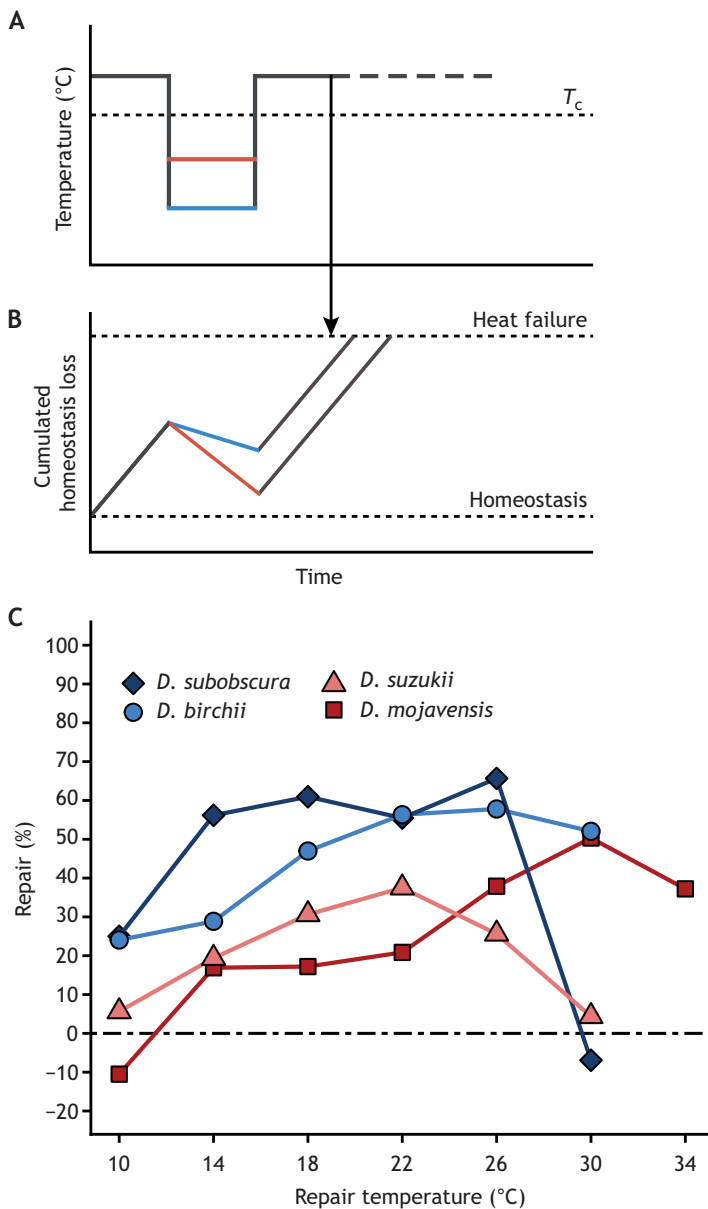

**Fig. 5. Homeostatic capacity (repair) rates are temperature dependent.**

(A) Outline of a 'split-dose' temperature profile to quantify repair rates. Exposure to a constant temperature (above  $T_c$ ) for the duration that corresponds to 50% of the predicted failure time is followed by a period at temperatures below  $T_c$  (blue and red lines) to allow re-establishment of homeostasis (repair). In a subsequent exposure to the same stressful temperature, time to heat failure is noted. If homeostasis has not been restored (repaired), failure is expected when the remaining 50% of the failure duration has passed (arrow), due to the additivity of heat stress. (B) A net loss of homeostasis accumulates during the initial heat stress dose. If repair processes restore homeostasis in a temperature-dependent manner, then re-exposure to heat stress following repair will result in different increases in heat failure time [compare the two treatments (arrow)]. (C) Preliminary data from *Drosophila*: *D. subobscura*, *D. suzukii*, *D. birchii* and *D. mojavensis* exposed to the species-specific stressful high temperature with a calculated heat knockdown time of about 3 h (based on initial TDT curves). In the first exposure, individuals were exposed to the stressful temperature for 50% of that time (ca. 1.5 h). Flies were subsequently transferred to temperatures between 10 and 34°C for 6 h to allow for repair, and then returned to the species-specific stressful temperature, and knockdown time was recorded. Here, the percentage of repair (percentage of initial thermal injury dose) is plotted against repair temperature. Thus, 0% indicates that knockdown time was unaffected by the time spent at benign temperature, i.e. no restoration of homeostasis, and 100% indicates that the homeostasis loss accumulated in the initial thermal dose was completely repaired, i.e. the treated individual had the same knockdown time as naive conspecifics. These pilot data indicate that repair is temperature sensitive, with the highest repair rate at intermediate temperatures and only the desert species (*D. mojavensis*) was able to repair at the highest temperature (34°C).

should converge to zero at  $T_c$ . It can also be argued that net repair capacity will not continue to increase indefinitely as temperatures decrease below  $T_c$  (Fig. 4). Ultimately, low temperatures will limit the capacity for repair and further it is assumed that at sufficiently low temperatures other processes will start to disrupt homeostasis as a result of cold stress (MacMillan and Sinclair, 2011; Nedvĕd et al., 1998; Overgaard et al., 2021).

To briefly exemplify the thermal sensitivity of repair we used 'split-dose' experiments inspired by Kashmeery and Bowler (1977) where two stressful exposures are separated by a period at a permissive temperature allowing for repair. With this protocol, we examined the temperature dependence of repair in four species of *Drosophila* (Fig. 5A,B) by varying the temperature of the 'repair' period between the two stress exposures. The preliminary results support that net repair occurs when flies are allowed a period at permissive temperatures, and further that repair rate is temperature dependent (Fig. 5C) such that repair capacity declines at both low (probably due to slowed metabolism) and high temperature (due to the increased proximity to  $T_c$  and increased disruption rate).

### The physiological cause of heat injury in ectotherms

There is currently no consensus on a single physiological dysfunction that is considered the proximal cause of acute heat failure in all ectotherms (Jutfelt et al., 2018; Pörtner, 2001; Somero et al., 2017; Vornanen, 2020). Several hypotheses have been proposed to explain ectothermic heat failure, and most of these can be linked to one or more of the five biological processes highlighted by Schmidt-Nielsen (1997): (i) protein denaturation, (ii) thermal inactivation of enzymes, (iii) inadequate oxygen supply, (iv) unbalanced temperature effects on interdependent metabolic reactions or (v) membrane dysfunction. These five 'heat failure hypotheses' are not mutually exclusive and several physiological dysfunctions may operate in unison to cause the high thermal sensitivity that characterizes heat failure (Fig. 2). For this review, we emphasize that these heat failure hypotheses easily integrate with a simple model balancing homeostatic capacity versus homeostatic disruption (Fig. 4). Specifically, we discuss this in relation to three examples: (i) oxygen limitation, (ii) protein denaturation and (iii) membrane effects on cellular excitability.



The much-debated ‘oxygen- and capacity-limited thermal tolerance’ hypothesis (OCLTT; Pörtner and Farrell, 2008; Clark et al., 2013; Verberk et al., 2016; Jutfelt et al., 2018) poses that ectotherms reach their critical thermal limit when the capacity for aerobic mitochondrial ATP production no longer matches the requirements of the standard metabolic rate (Pörtner, 2001). Limitations to aerobic ATP production at high temperature have often been linked to insufficient oxygen transport, including inadequate cardiac function (Pörtner, 2001; Pörtner and Farrell, 2008). However, compromised mitochondrial coupling and ATP production at high temperature are increasingly being discussed in relation to this hypothesis (Blier et al., 2014; Chung and Schulte, 2020; Hraoui et al., 2020; Iftikar and Hickey, 2013; Jørgensen et al., 2021a; Michaelsen et al., 2021). The OCLTT hypothesis has received mixed experimental support, particularly for terrestrial ectotherms (Fobian et al., 2014; Verberk et al., 2016). Nevertheless, the central tenets of the OCLTT hypothesis are easily integrated with a model of a temperature-sensitive (im)balance of homeostatic capacity (ATP synthesis rate) versus homeostatic disruption (ATP demand) (Fig. 4). The OCLTT hypothesis further aligns because it explains that reduced performance (declining TPC) at the highest permissive temperatures results from decreasing aerobic scope caused by the reduced difference between the antagonistic rates (ATP synthesis versus ATP demand) (Pörtner, 2001; Pörtner and Farrell, 2008; Ern, 2019).

A second hypothesis relates to increased expression or translation of heat shock proteins (hsps) which is a hallmark of heat stress in ectotherms (Feder and Hofmann, 1999; Parsell and Lindquist, 1993; Ritossa, 1962; Tomanek, 2010). The expression of inducible hsps during heat stress is somewhat proportional to net protein denaturation and heat stress can therefore be viewed as an (im)balance of homeostatic disruption (denaturation rate) versus homeostatic capacity (removal rate of denatured protein or rate of *de novo* protein synthesis). The imbalance between these antagonistic rates can be assessed from the magnitude of hsp expression, and several studies support that accumulated protein denaturation is tightly linked to heat failure. For example, (i) cumulative hsp expression is proportional to accumulated heat stress during fast and slow heat ramping in *Drosophila*, although the temperature of heat failure is different between ramping rates (Sørensen et al., 2013), (ii) heat hardening through a brief pre-exposure to heat stress increases hsp expression which subsequently augments the homeostatic capacity rate and therefore increases heat tolerance (Feder and Hofmann, 1999; Parsell and Lindquist, 1993; Sørensen et al., 2003; Tomanek, 2010), and (iii) protein degradation is extremely sensitive to temperature ( $Q_{10}=10-1000$ ; Ushakov, 1964; Cossins and Bowler, 1987; Tattersall et al., 2012), which is similar to the very high  $Q_{10}$  found for organismal failure beyond  $T_c$  (Fig. 2; Jørgensen et al., 2022).

A third hypothesis compatible with the model outlined in Fig. 4 relates to the imbalance of membrane processes strengthening or weakening cellular excitability. In insects, it is well described that heat knockdown is associated with a shutdown of the central nervous system (CNS). This is caused by a surge in extracellular  $[K^+]$ , resulting from an imbalance between active and passive ion transport, that ultimately depolarizes the neurons, causing neuronal silencing (Armstrong et al., 2009; Jørgensen et al., 2020; Robertson et al., 2020; Spong et al., 2016). Similar perturbations in CNS function are also found in other ectotherms at temperatures close to  $CT_{max}$  (Andreassen et al., 2022; Friedlander et al., 1976; Hamby, 1975; Jutfelt et al., 2019; Orr, 1955) and loss of ion balance in the extracellular fluid surrounding muscle has also been implicated in

ectothermic heat failure (Gladwell et al., 1975; Grainger, 1975). Finally, Vornanen (2016, 2020) argues that heat tolerance is governed by the ‘temperature-dependent deterioration of electrical excitability’ (TDEE) hypothesis, which poses that unbalanced thermal sensitivity of excitatory ( $Na^+$  current) and inhibitory currents ( $K^+$  current) compromises the generation of cardiac action potentials, which eventually causes cardiac failure. From these examples, a temperature-sensitive antagonistic interaction between passive/active or excitatory/inhibitory ion transport across membranes could also explain why heat failure rates increase exponentially with increasing temperature.

Collectively, these three examples show that it is both straightforward and appropriate to integrate leading physiological hypotheses of heat failure with a model of two temperature-sensitive antagonistic rates. One rate determines the capacity for maintenance/restoration of homeostasis (e.g. ATP synthesis rate, protein synthesis rate or active ion transport) and the other rate, increasing faster with temperature, acts to disrupt homeostasis (e.g. ATP use, protein denaturation or passive ion leak). In the permissive temperature range, homeostatic capacity exceeds the disruption rate allowing for chronic survival, whereas the acutely stressful temperatures are dominated by disruption rates accumulating imbalance, which directly dictates survival duration (Figs 2, 3 and 4). The balance between these antagonistic rates will therefore also determine the critical transition temperature  $T_c$  and the potential for repair (Fig. 5).

## Application of the TDT model in physiological, evolutionary and ecological studies

### Comparing thermal tolerance limits between studies that use different $CT_{max}$ protocols

Estimates of thermal tolerance are frequently compared within or between species to infer eco-physiological patterns (Addo-Bediako et al., 2000; Ghalambor et al., 2006; Hoffmann et al., 2013; Kovacevic et al., 2019; Pinsky et al., 2019; Sunday et al., 2011; Sunday et al., 2019). Such comparisons are complicated by the variable use of static and dynamic protocols to assess tolerance limits (Bak et al., 2020; Kovacevic et al., 2019; Rezende et al., 2014; Santos et al., 2011; Terblanche et al., 2007; Terblanche et al., 2011). However, as outlined above, tolerance measures can be reconciled and converted to a common estimate using the TDT parameters, e.g. the maximal static temperature tolerable for 1 h ( $sCT_{max(1h)}$ ). To illustrate this, Jørgensen et al. (2021b) compiled and recalculated heat tolerance measures using data obtained from different sources of static or dynamic assays. Despite the original measures being based on very different protocols, populations and acclimation statuses, the recalculated  $sCT_{max(1h)}$  values were remarkably similar within species (Fig. 6A; for more examples, see Jørgensen et al., 2021b), suggesting that the TDT model has promising applications in meta-analyses where a standardized measure of heat tolerance allows direct comparison.

### Using TDT models in evolutionary/comparative studies of thermal physiology

The TDT model represents a powerful tool for designing experiments to test the heat tolerance of different species, populations, acclimation groups, etc. (Fig. 6B). Comparing groups with different heat tolerance limits and  $T_c$  can be problematic, as it may be difficult to find a treatment suitable for all groups. For example, if groups are tested at the same temperature and duration, this treatment may be above  $T_c$  for some groups, but below  $T_c$  for others (line *a* in Fig. 6B). Even above  $T_c$ , the level of stress inflicted on the groups may differ considerably for a given duration at the treatment temperature (line *b* in Fig. 6B).

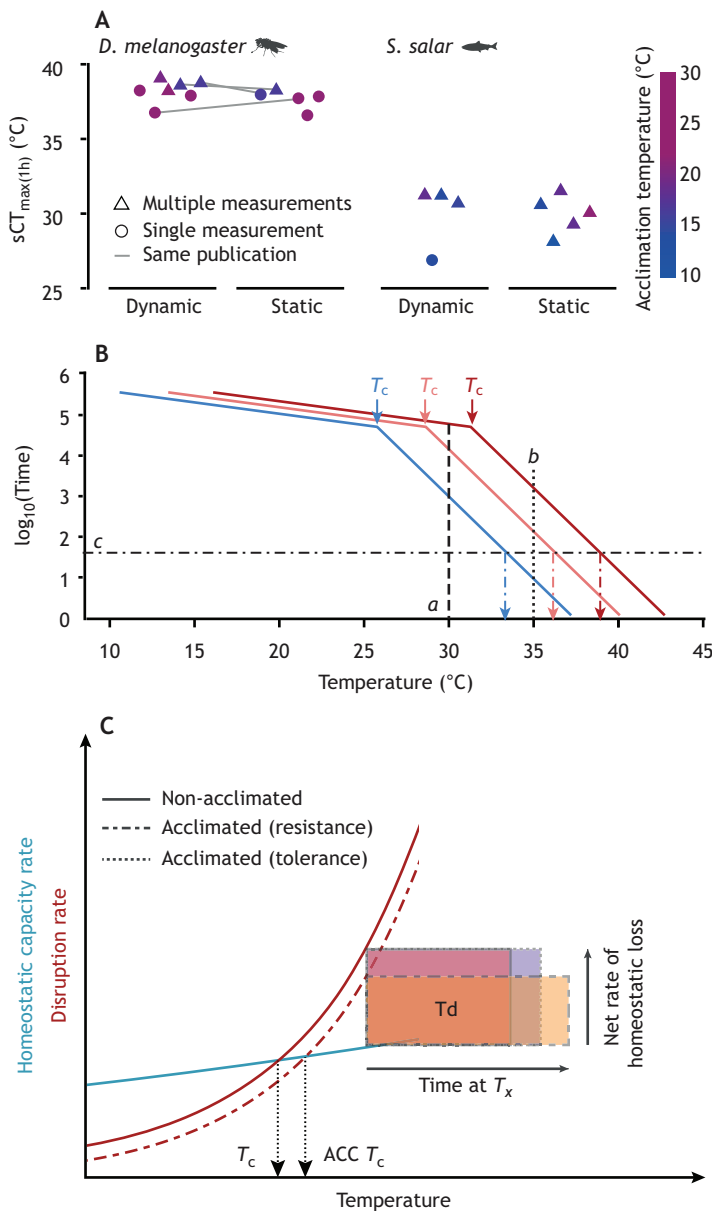

**Fig. 6. Using the TDT model in comparative studies.** (A) The TDT model can be used to compare thermal tolerance limits between studies that use different CT<sub>max</sub> protocols. Heat tolerance measures from *Drosophila melanogaster* and *Salmo salar* were used to parameterize TDT models to calculate a single comparable metric – the static temperature causing heat failure after 1 h (sCT<sub>max(1h)</sub>). Most estimates were derived from TDT models with multiple measurements (triangles), others with only a single measurement (circles; z approximated). A line between points indicates that the measurements are from the same study. Although the original measures are based on very different protocols, populations and acclimation statuses, the estimated sCT<sub>max(1h)</sub> values are remarkably similar within species. Adapted from Jørgensen et al. (2021b). (B) Three horizontally shifted TDT curves representing a comparison of hypothetical species/populations/acclimation groups. Exposure to the same treatment temperature for all treatments groups risks that some groups are tested above  $T_c$  and others below  $T_c$  (dashed line *a*). This design essentially compares acute effects of temperature on survival in some groups with chronic effects on life expectancy in others. Testing groups at the same temperature and duration (here, min) with all groups above  $T_c$  (dotted line *b*) will compare very different levels of heat stress. Finally, it is possible to test all groups to the same degree of thermal stress using group-specific temperatures, e.g. the group-specific sCT<sub>max(1h)</sub> (dash-dotted line *c* and coloured arrows). (C) Acclimation/adaptation to high temperatures can change the susceptibility to heat stress by changing resistance (change in  $T_c$ ) or tolerance (change in  $T_d$ ). Solid coloured lines represent rates of disruption (red) and homeostatic capacity (blue), which intersect at the critical temperature  $T_c$  (see Fig. 4). Acclimation/adaptation-induced changes in any of the antagonistic rates (here exemplified by a decreased disruption rate; dashed line) result in an increased  $T_c$  (ACC  $T_c$ ) and therefore an increased survival time (compare red and orange rectangles that have the same  $T_d$ ; see also Fig. 3). If acclimation/adaptation increases tolerance, then the amount of tolerable homeostatic loss increases (larger  $T_d$ , compare increased area of purple versus red rectangle).

Accordingly, the associated behavioural or physiological responses of the groups may represent different information on chronic and acute temperature effects (see also Fig. 2). However, using information from the TDT model, it is possible to expose treatment groups to the same stress intensity (same level of homeostatic failure) using temperatures (or durations) specific to each group (line *c* in Fig. 6B). Such an approach will allow for more targeted experiments investigating the physiological mechanisms of thermal failure even if the experiments are performed on experimental groups that differ widely in thermal tolerance (Tarapacki et al., 2021).

**Studying thermal adaptation and acclimation in the context of heat failure rates**

Finally, the TDT model offers a framework to examine how temperature acclimation and adaptation (re)shape heat tolerance (Willot et al., 2022) or how nutritional status, water status and pathogens affect the heat stress response. In the context of the presented framework, we here discuss how acclimation or adaptation can affect heat susceptibility by changes in either

resistance or tolerance to heat stress (Fig. 6C). Increased resistance can be achieved through modification of one (or both) of the two antagonistic rates determining net heat stress (rates of disruption and homeostatic maintenance, respectively; Fig. 4). Changing the rate of either disruption or homeostatic maintenance will increase  $T_c$  (compare solid and dashed red line in Fig. 6C). Heat stress susceptibility can also change by altering tolerance, which is equivalent to increasing  $T_d$  (graphically an increased area of the thermal dose rectangle; Figs 3 and 6C). In this scenario, tolerance time increases even when homeostasis is lost at the same rate and above the same  $T_c$  (Fig. 6C). The difference between increased tolerance and resistance can be discerned by examining putative changes in  $T_c$  following acclimation/adaptation (Angilletta, 2009; Cossins and Bowler, 1987; Fry et al., 1946; Hoffmann and Todgham, 2010). Furthermore, increases in tolerance can be inferred from evaluating how markers of heat stress have accumulated at different levels of heat stress, e.g. indicated by higher lactate levels, hsp levels or the level of ionic imbalance (Sørensen et al., 2013; Tarapacki et al., 2021).

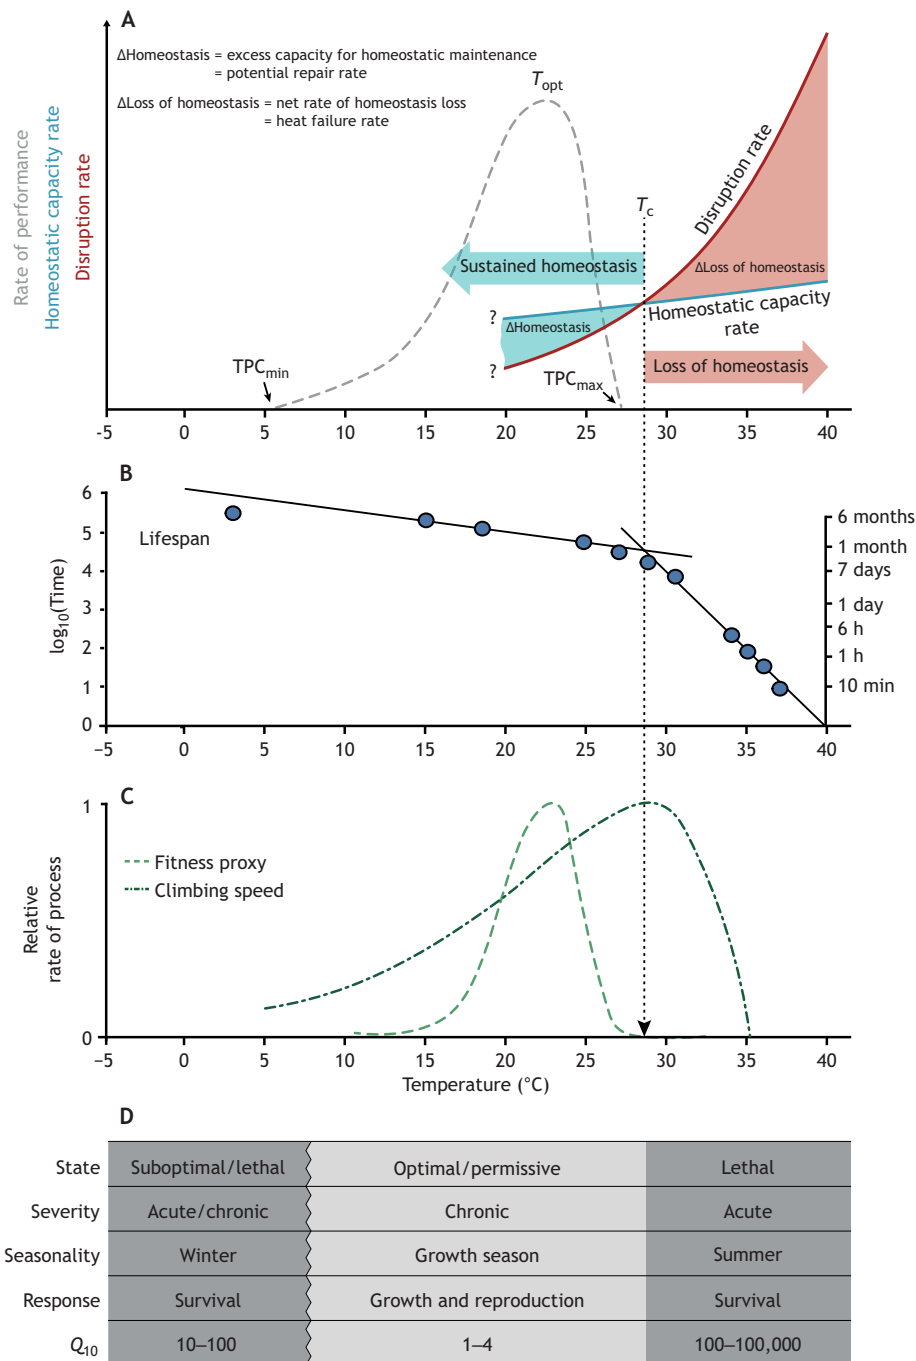

**Fig. 7. Ectotherm temperature tolerance and performance across permissive and stressful temperature domains.** Our proposed framework defines a critical temperature,  $T_c$ , separating the permissive temperature range allowing for population growth from the stressful temperature range causing acute thermal injury. The physiological origin of this separation stems from the balance between the two theoretical antagonistic biological processes responsible for maintaining or disrupting homeostasis ('injury' and 'repair', in red and blue curves, respectively).  $T_c$  is contrasted with a hypothetical TPC (dashed grey line) outlined by the lower and upper critical temperature where performance is zero (termed ' $TPC_{min}$ ' and ' $TPC_{max}$ ', respectively). Importantly, these TPC limits of population growth should not be related to any measure of acute heat/cold tolerance. (B) The net rate of homeostatic loss above  $T_c$  dictates the tolerable exposure duration as conveyed by the TDT model. Thus,  $T_c$  separates processes that are related to 'the rate of death' in the stressful temperature range from the processes determining 'the rate of life' in the permissive temperature range. This transition is illustrated with lifespan (in min) measured across a wide temperature range in *Drosophila subobscura* (Hollingsworth, 1969). Similar principles can be applied at low temperatures where ectotherms suffer from cold stress (not shown). (C) Comparing different TPCs to infer thermal limits can be problematic, particularly if the performance trait spans  $T_c$ . Here, we contrast two TPCs for *D. subobscura*; one trait is a proxy for population growth/fitness (product of egg-laying capacity, egg to adult viability and developmental speed; MacLean et al., 2019) and the other trait measures spontaneous activity (climbing speed; Mesas et al., 2021). The rate of the fitness proxy approaches zero at temperatures below  $T_c$ , while activity rate spans temperatures below and above  $T_c$  and in this example the apparent  $T_{opt}$  coincides with  $T_c$ . The activity trait is obviously important for many physiological and behavioural responses to temperature, but the  $T_{opt}$  and thermal limits of such 'indirect' fitness traits should be interpreted with caution. (D) Ageing rates and biological processes in the permissive temperature range are characterized by a 'normal' thermal sensitivity ( $Q_{10} \approx 1-4$ ) which contrasts the extreme temperature sensitivity of acute heat failure rate in the stressful range (typically  $Q_{10} > 1000$ ). Collectively, these observations highlight why different analyses are relevant in the permissive and stressful temperature ranges, respectively.

### Concluding remarks and future perspectives

The framework presented here (summarized in Fig. 7) separates permissive and stressful temperature ranges and allows for ecological and physiological assessment of heat stress based on the balance between two antagonistic biological processes (thermal injury and repair; Fig. 7A). This model therefore also provides an understanding of how temperature sensitivity of different biological processes underpins the TPC and the TDT model. Central to this framework is a clear boundary,  $T_c$ , which separates the permissive and stressful temperature ranges (Fig. 7). Acknowledging these temperature ranges with vastly different thermal sensitivities therefore allows for better integration of observations across studies and provides a conceptual model to study the temperature tolerance traits that are essential for predicting species' responses to climate change (Jørgensen et al., 2022).

Future efforts should investigate how  $T_c$  is best determined experimentally. Our suggestions for experiments that potentially may uncover this include; (i) creating TDT curves over sufficiently wide temperature ranges to uncover the actual breakpoints between permissive and stressful temperatures ranges (Fry, 1971; Fry et al., 1946; Hollingsworth, 1969) (Figs 2 and 7B), (ii) initiating dynamic assays at different temperatures, where a start temperature  $>T_c$  would result in increased  $CT_{max}$ , whereas start temperatures  $<T_c$  should have negligible effects on the  $CT_{max}$  estimate (Kingsolver and Umbanhowar, 2018), (iii) measuring  $CT_{max}$  at gradually slower ramping rates as the resulting  $CT_{max}$  estimates should then approach  $T_c$  asymptotically (Richard et al., 2012) and (iv) estimating  $T_c$  as the 'resting' temperature where thermal injury is equal to the repair capacity during experiments of alternating stressful and benign temperatures (compare species repair capacities in Fig. 5C).

Another perspective resulting from this synthesis concerns the temperature fluctuations that many ectotherms experience naturally. Fluctuations that occur only above or below  $T_c$  are easy to integrate into the TDT or TPC model, respectively (Colinet et al., 2015; Deutsch et al., 2008; Fry et al., 1946; Jørgensen et al., 2021b; Sinclair et al., 2016). However, the situation is much more complex when fluctuations occur between the permissive and stressful temperature ranges as they are dominated by different thermal sensitivities, and especially for TPCs, different traits can span the two temperature ranges (Fig. 7C,D). Studies on the thermal sensitivity of heat stress repair are still scarce (Bowler and Kashmeery, 1979; Dillon et al., 2007; Dingley and Maynard Smith, 1968; Kovacevic et al., 2019) and currently it is difficult to distinguish repair from rapid hardening processes which can increase heat resistance/tolerance during subsequent exposures to heat stress (Bowler, 2005; Krebs and Loeschke, 1994; Sørensen et al., 2003). Although not the focus of this Review, many similar conceptual observations can also be applied to cold limits of ectotherms as these limits are also the result of unbalanced antagonistic processes (MacMillan and Sinclair, 2011; Overgaard et al., 2021). It may therefore be relevant to consult the cold tolerance literature, where the repeated transition from stressful to benign temperatures associated with 'fluctuating thermal regimes' and 'repeated cold exposures' has been investigated (Colinet et al., 2015; Colinet et al., 2018; Košťál et al., 2007; Marshall and Sinclair, 2012; Nedvěd et al., 1998).

Finally, the physiological rates underlying homeostatic capacity and disruption that ultimately determine  $CT_{max}$  are still intensely debated (Bowler, 2018; González-Tokman et al., 2020; Andreassen et al., 2022; Jutfelt et al., 2018; Neven, 2000; Pörtner and Farrell, 2008). We hope that appropriate integration of the TDT model in future experimental designs can help to identify the proximal physiological causes of heat stress susceptibility (Fig. 6B,C). The

framework presented here will, for example, allow for a systematic approach to experimentally associate homeostatic capacity rate and/or perturbation rate with physiological mechanisms hypothesized to cause heat death in ectotherms (oxygen limitation, protein denaturation, membrane dysfunction, neurological failure, etc.).

### Acknowledgements

We thank Jeppe Bayer and Loisa D. Bonde for laboratory assistance in repair experiments. We are grateful for the many discussions on temperature biology of animals with our colleagues at Section for Zoophysiology, Aarhus University, and we thank David Vasseur, Ray Huey and the anonymous reviewers for constructive feedback.

### Competing interests

The authors declare no competing or financial interests.

### Funding

This work was funded by The Danish Council for Independent Research | Technology and Production Sciences (Danmarks Frie Forskningsfond 0170-00006B to M.Ø.) and The Danish Council for Independent Research | Natural Sciences (Danmarks Frie Forskningsfond 9040-00348B to J.O.).

### References

- Addo-Bediako, A., Chown, S. L. and Gaston, K. J. (2000). Thermal tolerance, climatic variability and latitude. *Proceedings of the Royal Society of London. Series B: Biological Sciences* **267**, 739-745. doi:10.1098/rspb.2000.1065
- Andreassen, A. H., Hall, P., Khatibzadeh, P., Jutfelt, F. and Kermen, F. (2022). Brain dysfunction during warming is caused by oxygen limitation in larval zebrafish. *Proc. Natl. Acad. Sci. USA* **119**, e2207052119
- Angilletta, M. J. (2009). *Thermal Adaptation: A Theoretical and Empirical Synthesis*. Oxford University Press.
- Armstrong, G. A. B., Rodgers, C. I., Money, T. G. A. and Robertson, R. M. (2009). Suppression of spreading depression-like events in locusts by inhibition of the NO/cGMP/PKG pathway. *J. Neurosci.* **29**, 8225-8235. doi:10.1523/JNEUROSCI.1652-09.2009
- Bak, C. W., Bahrndorff, S., Noer, N. K., Jørgensen, L. B., Overgaard, J. and Nygaard Kristensen, T. (2020). Comparison of static and dynamic assays when quantifying thermal plasticity of drosophilids. *Insects* **11**, 537. doi:10.3390/insects11080537
- Bates, A. E. and Morley, S. A. (2020). Interpreting empirical estimates of experimentally derived physiological and biological thermal limits in ectotherms. *Can. J. Zool.* **98**, 237-244. doi:10.1139/cjz-2018-0276
- Bennett, J. M., Sunday, J., Calosi, P., Villalobos, F., Martínez, B., Molina-Venegas, R., Araújo, M. B., Algar, A. C., Clusella-Trullas, S., Hawkins, B. A. et al. (2021). The evolution of critical thermal limits of life on Earth. *Nat. Commun.* **12**, 1198. doi:10.1038/s41467-021-21263-8
- Bigelow, W. D. (1921). The logarithmic nature of thermal death time curves. *J. Infect. Dis.* **29**, 528-536. doi:10.1093/infdis/29.5.528
- Blier, P. U., Lemieux, H., Pichaud, N. (2014). Holding our breath in our modern world: will mitochondria keep the pace with climate changes? *Can. J. Zool.* **92**, 591-601. doi:10.1139/cjz-2013-0183
- Bowler, K. (2005). Acclimation, heat shock and hardening. *J. Therm. Biol.* **30**, 125-130. doi:10.1016/j.jtherbio.2004.09.001
- Bowler, K. (2018). Heat death in poikilotherms: Is there a common cause? *J. Therm. Biol.* **76**, 77-79. doi:10.1016/j.jtherbio.2018.06.007
- Bowler, K. and Kashmeery, A. M. S. (1979). Recovery from heat injury in the blowfly, *Calliphora erythrocephala*. *J. Therm. Biol.* **4**, 197-202. doi:10.1016/0306-4565(79)90001-9
- Brown, L. A. and Crozier, W. J. (1927). The rate of killing cladocerans at higher temperatures. *J. Gen. Physiol.* **11**, 25-36. doi:10.1085/jgp.11.1.25
- Brown, J. H., Gillooly, J. F., Allen, A. P., Savage, V. M. and West, G. B. (2004). Toward a metabolic theory of ecology. *Ecology* **85**, 1771-1789. doi:10.1890/03-9000
- Buckley, L. B. and Huey, R. B. (2016). Temperature extremes: geographic patterns, recent changes, and implications for organismal vulnerabilities. *Glob. Change Biol.* **22**, 3829-3842. doi:10.1111/gcb.13313
- Buckley, L. B., Huey, R. B. and Kingsolver, J. G. (2022). Asymmetry of thermal sensitivity and the thermal risk of climate change. *Glob. Ecol. Biogeogr.* doi:10.1111/geb.13570
- Chen, C. P. and Walker, V. K. (1994). Cold-shock and chilling tolerance in *Drosophila*. *J. Insect Physiol.* **40**, 661-669. doi:10.1016/0022-1910(94)90093-0
- Chown, S. L., Jumbam, K. R., Sørensen, J. G. and Terblanche, J. S. (2009). Phenotypic variance, plasticity and heritability estimates of critical thermal limits depend on methodological context. *Funct. Ecol.* **23**, 133-140. doi:10.1111/j.1365-2435.2008.01481.x
- Chung, D. J. and Schulte, P. M. (2020). Mitochondria and the thermal limits of ectotherms. *J. Exp. Biol.* **223**, jeb227801. doi:10.1242/jeb.227801

- Clark, T. D., Sandblom, E. and Jutfelt, F. (2013). Aerobic scope measurements of fishes in an era of climate change: respirometry, relevance and recommendations. *J. Exp. Biol.* **216**, 2771-2782. doi:10.1242/jeb.084251
- Clusella-Trullas, S., Garcia, R. A., Terblanche, J. S. and Hoffmann, A. A. (2021). How useful are thermal vulnerability indices? *Trends Ecol. Evol.* **36**, 1000-1010. doi:10.1016/j.tree.2021.07.001
- Colinet, H., Sinclair, B. J., Vernon, P. and Renault, D. (2015). Insects in fluctuating thermal environments. *Annu. Rev. Entomol.* **60**, 123-140. doi:10.1146/annurev-ento-010814-021017
- Colinet, H., Rinehart, J. P., Yocum, G. D. and Greenlee, K. J. (2018). Mechanisms underpinning the beneficial effects of fluctuating thermal regimes in insect cold tolerance. *J. Exp. Biol.* **221**, jeb164806. doi:10.1242/jeb.164806
- Cooper, B. S., Williams, B. H. and Angilletta, M. J. (2008). Unifying indices of heat tolerance in ectotherms. *J. Therm. Biol.* **33**, 320-323. doi:10.1016/j.jtherbio.2008.04.001
- Cossins, A. R. and Bowler, K. (1987). *Temperature Biology of Animals*, 1st edn. London: Chapman and Hall.
- Dell, A. I., Pawar, S. and Savage, V. M. (2011). Systematic variation in the temperature dependence of physiological and ecological traits. *Proc. Natl. Acad. Sci. U.S.A.* **108**, 10591-10596. doi:10.1073/pnas.1015178108
- Deutsch, C. A., Tewksbury, J. J., Huey, R. B., Sheldon, K. S., Ghalambor, C. K., Haak, D. C. and Martin, P. R. (2008). Impacts of climate warming on terrestrial ectotherms across latitude. *Proc. Natl. Acad. Sci. U.S.A.* **105**, 6668-6672. doi:10.1073/pnas.0709472105
- Dillon, M., Cahn, L. and Huey, R. (2007). Life history consequences of temperature transients in *Drosophila melanogaster*. *J. Exp. Biol.* **210**, 2897-2904. doi:10.1242/jeb.007591
- Dingley, F. and Maynard Smith, J. (1968). Temperature acclimatization in the absence of protein synthesis in *Drosophila subobscura*. *J. Insect Physiol.* **14**, 1185-1194. doi:10.1016/0022-1910(68)90058-9
- Doudoroff, P. (1945). The Resistance and Acclimatization of Marine Fishes to Temperature Changes. II. Experiments with *Fundulus* and *Atherinops*. *The Biological Bulletin* **88**, 194-206.
- Easterling, D. R., Meehl, G. A., Parmesan, C., Changnon, S. A., Karl, T. R. and Mearns, L. O. (2000). Climate extremes: Observations, modeling, and impacts. *Science* **289**, 2068-2074. doi:10.1126/science.289.5487.2068
- Ern, R. (2019). A mechanistic oxygen- and temperature-limited metabolic niche framework. *Phil. Trans. Roy. Soc. B* **374**, 20180540.
- Feder, M. E. and Hofmann, G. E. (1999). Heat-shock proteins, molecular chaperones, and the stress response: evolutionary and ecological physiology. *Annu. Rev. Physiol.* **61**, 243-282. doi:10.1146/annurev.physiol.61.1.243
- Fobian, D., Overgaard, J. and Wang, T. (2014). Oxygen transport is not compromised at high temperature in pythons. *J. Exp. Biol.* **217**, 3958-3961.
- Friedlander, M. J., Kotchabhakdi, N. and Prosser, C. L. (1976). Effects of cold and heat on behavior and cerebellar function in goldfish. *J. Comp. Physiol. A* **112**, 19-45. doi:10.1007/BF00612674
- Fry, F. E. J. (1947). Effects of the environment on animal activity. *Publications of the Ontario Fisheries Research Laboratory* **55**, 1-62.
- Fry, F. E. J. (1971). The effect of environmental factors on the physiology of fish. *Fish Physiol.* **6**, 1-98. doi:10.1016/S1546-5098(08)60146-6
- Fry, F. E. J., Hart, J. S. and Walker, K. F. (1946). Lethal temperature relations for a sample of young speckled trout, *Salvelinus fontinalis*. *Publications of the Ontario Fisheries Research Laboratory* **9-35**.
- Ghalambor, C. K., Huey, R. B., Martin, P. R., Tewksbury, J. J. and Wang, G. (2006). Are mountain passes higher in the tropics? Janzen's hypothesis revisited. *Integr. Comp. Biol.* **46**, 5-17. doi:10.1093/icb/iccj003
- Gilchrist, G. W. (1995). Specialists and Generalists in Changing Environments. I. Fitness Landscapes of Thermal Sensitivity. *Am. Nat.* **146**, 252-270. doi:10.1086/285797
- Gladwell, R. T., Bowler, K. and Duncan, C. J. (1975). Heat death in the crayfish *Austropotamobius pallipes* - Ion movements and their effects on excitable tissues during heat death. *J. Therm. Biol.* **1**, 79-94. doi:10.1016/0306-4565(76)90026-7
- González-Tokman, D., Córdoba-Aguilar, A., Dáttilo, W., Lira-Noriega, A., Sánchez-Guillén, R. A. and Villalobos, F. (2020). Insect responses to heat: physiological mechanisms, evolution and ecological implications in a warming world. *Biol. Rev.* **95**, 802-821. doi:10.1111/brv.12588
- Grainger, J. N. R. (1975). Mechanism of death at high temperatures in *Helix* and *Patella*. *J. Therm. Biol.* **1**, 11-13. doi:10.1016/0306-4565(75)90005-4
- Hamby, R. J. (1975). Heat effects on a marine snail. *Biol. Bull.* **149**, 331-347. doi:10.2307/1540530
- Hochachka, P. W. and Somero, G. N. (2002). *Biochemical Adaptation: Mechanism and Process in Physiological Evolution*. New York: Oxford University Press.
- Hoffmann, G. E. and Todgham, A. E. (2010). Living in the now: physiological mechanisms to tolerate a rapidly changing environment. *Annu. Rev. Physiol.* **72**, 127-145. doi:10.1146/annurev-physiol-021909-135900
- Hoffmann, A. A., Sørensen, J. G. and Loeschcke, V. (2003). Adaptation of *Drosophila* to temperature extremes: bringing together quantitative and molecular approaches. *J. Therm. Biol.* **28**, 175-216. doi:10.1016/S0306-4565(02)00057-8
- Hoffmann, A. A., Chown, S. L. and Clusella-Trullas, S. (2013). Upper thermal limits in terrestrial ectotherms: How constrained are they? *Funct. Ecol.* **27**, 934-949. doi:10.1111/j.1365-2435.2012.02036.x
- Hollingsworth, M. J. (1969). Temperature and length of life in *Drosophila*. *Exp. Gerontol.* **4**, 49-55. doi:10.1016/0531-5565(69)90026-6
- Hraoui, G., Bettinazzi, S., Gendron, A. D., Boisclair, D. and Breton, S. (2020). Mitochondrial thermo-sensitivity in invasive and native freshwater mussels. *J. Exp. Biol.* **223**, jeb215921. doi:10.1242/jeb.215921
- Huey, R. B. and Berrigan, D. (2001). Temperature, demography, and ectotherm fitness. *Am. Nat.* **158**, 204-210. doi:10.1086/321314
- Huey, R. B. and Stevenson, R. D. (1979). Integrating thermal physiology and ecology of ectotherms: a discussion of approaches. *Integr. Comp. Biol.* **19**, 357-366.
- Huey, R. B., Kearney, M. R., Krockenberger, A., Holtum, J. A. M., Jess, M. and Williams, S. E. (2012). Predicting organismal vulnerability to climate warming: Roles of behaviour, physiology and adaptation. *Phil. Trans. R. Soc. B Biol. Sci.* **367**, 1665-1679. doi:10.1098/rstb.2012.0005
- Iandolo, J. J. and Ordal, Z. J. (1966). Repair of thermal injury of *Staphylococcus aureus*. *J. Bacteriol.* **91**, 134-142. doi:10.1128/jb.91.1.134-142.1966
- Iftikar, F. I. and Hickey, A. J. R. (2013). Do mitochondria limit hot fish hearts? Understanding the role of mitochondrial function with heat stress in *Notolabrus celidotus*. *PLoS ONE* **8**, e64120. doi:10.1371/journal.pone.0064120
- IPCC (2021). *Climate Change 2021: The physical science basis. Contribution of Working Group I to the Sixth Assessment Report of the Intergovernmental Panel on Climate Change*. Cambridge University Press.
- Jacobs, M. H. (1919). Acclimatization as a factor affecting the upper thermal death points of organisms. *J. Exp. Zool* **27**, 427-442. doi:10.1002/jez.1400270308
- Jørgensen, L. B., Malte, H. and Overgaard, J. (2019). How to assess *Drosophila* heat tolerance: Unifying static and dynamic tolerance assays to predict heat distribution limits. *Funct. Ecol.* **33**, 629-642. doi:10.1111/1365-2435.13279
- Jørgensen, L. B., Robertson, R. M. and Overgaard, J. (2020). Neural dysfunction correlates with heat coma and CT<sub>max</sub> in *Drosophila* but does not set the boundaries for heat stress survival. *J. Exp. Biol.* **223**, jeb218750. doi:10.1242/jeb.218750
- Jørgensen, L. B., Overgaard, J., Hunter-Manseau, F. and Pichaud, N. (2021a). Dramatic changes in mitochondrial substrate use at critically high temperatures: a comparative study using *Drosophila*. *J. Exp. Biol.* **224**, jeb240960. doi:10.1242/jeb.240960
- Jørgensen, L. B., Malte, H., Ørsted, M., Klahn, N. A. and Overgaard, J. (2021b). A unifying model to estimate thermal tolerance limits in ectotherms across static, dynamic and fluctuating exposures to thermal stress. *Sci. Rep.* **11**, 12840. doi:10.1038/s41598-021-92004-6
- Jørgensen, L. B., Ørsted, M., Malte, H., Wang, T. and Overgaard, J. (2022). Extreme thermal sensitivity escalates heat failure in ectotherms with climate warming. *Nature*. doi:10.1038/s41586-022-05334-4
- Jutfelt, F., Norin, T., Ern, R., Overgaard, J., Wang, T., McKenzie, D. J., Lefevre, S., Nilsson, G. E., Metcalfe, N. B., Hickey, A. J. R. et al. (2018). Oxygen- and capacity-limited thermal tolerance: blurring ecology and physiology. *J. Exp. Biol.* **221**, jeb169615. doi:10.1242/jeb.169615
- Jutfelt, F., Roche, D. G., Clark, T. D., Norin, T., Binning, S. A., Speers-Roesch, B., Amcoff, M., Morgan, R., Andreassen, A. H. and Sundin, J. (2019). Brain cooling marginally increases acute upper thermal tolerance in Atlantic cod. *J. Exp. Biol.* **222**, jeb208249. doi:10.1242/jeb.208249
- Kashmeery, A. M. S. and Bowler, K. (1977). A study of recovery from heat injury in the blowfly (*Calliphora erythrocephala*) using split-dose experiments. *J. Therm. Biol.* **2**, 183-184. doi:10.1016/0306-4565(77)90028-6
- Kellermann, V. and van Heerwaarden, B. (2019). Terrestrial insects and climate change: adaptive responses in key traits. *Physiol. Entomol.* **44**, 99-115. doi:10.1111/phen.12282
- Kellermann, V., Chown, S. L., Schou, M. F., Aitkenhead, I., Janion-Schepers, C., Clemson, A., Scott, M. T. and Sgrò, C. M. (2019). Comparing thermal performance curves across traits: how consistent are they? *J. Exp. Biol.* **222**, 193433. doi:10.1242/jeb.193433
- Kellermann, V., Overgaard, J., Hoffmann, A. A., Fløjgaard, C., Svenning, J.-C. and Loeschcke, V. (2012). Upper thermal limits of *Drosophila* are linked to species distributions and strongly constrained phylogenetically. *Proc. Natl. Acad. Sci. U.S.A.* **109**, 16228-16233. doi:10.1073/pnas.1207553109
- Kilgour, D. M. and McCauley, R. W. (1986). Reconciling the two methods of measuring upper lethal temperatures in fishes. *Environ. Biol. Fishes* **17**, 281-290. doi:10.1007/BF00001494
- Kilgour, D. M., McCauley, R. W. and Kwain, W. (1985). Modeling the lethal effects of high temperature on fish. *Can. J. Fish. Aquat. Sci.* **42**, 947-951. doi:10.1139/f85-119
- Kingsolver, J. G. and Umbanhowar, J. (2018). The analysis and interpretation of critical temperatures. *J. Exp. Biol.* **221**, jeb167858. doi:10.1242/jeb.167858
- Kingsolver, J. G. and Woods, H. A. (1997). Thermal sensitivity of growth and feeding in *Manduca sexta* caterpillars. *Physiol. Zool.* **70**, 631-638. doi:10.1086/515872

- Kingsolver, J. G. and Woods, H. A.** (2016). Beyond thermal performance curves: Modeling time-dependent effects of thermal stress on ectotherm growth rates. *Am. Nat.* **187**, 283-294. doi:10.1086/684786
- Kingsolver, J. G., Diamond, S. E. and Buckley, L. B.** (2013). Heat stress and the fitness consequences of climate change for terrestrial ectotherms. *Funct. Ecol.* **27**, 1415-1423. doi:10.1111/1365-2435.12145
- Košťál, V., Renault, D., Mehribanová, A. and Bastl, J.** (2007). Insect cold tolerance and repair of chill-injury at fluctuating thermal regimes: Role of ion homeostasis. *Comp. Biochem. Physiol. A* **147**, 231-238. doi:10.1016/j.cbpa.2006.12.033
- Kovacevic, A., Latombe, G. and Chown, S. L.** (2019). Rate dynamics of ectotherm responses to thermal stress. *Proc. R. Soc. B* **286**, 20190174. doi:10.1098/rspb.2019.0174
- Krebs, R. A. and Loeschcke, V.** (1994). Costs and Benefits of Activation of the Heat-Shock Response in *Drosophila melanogaster*. *Funct. Ecol.* **8**, 730. doi:10.2307/2390232
- Loeb, J. and Northrop, J. H.** (1916). Is There a Temperature Coefficient for the Duration of Life? *Proc. Natl Acad. Sci. USA* **2**, 456-457. doi:10.1073/pnas.2.8.456
- Lutterschmidt, W. I. and Hutchison, V. H.** (1997a). The critical thermal maximum: data to support the onset of spasms as the definitive end point. *Can. J. Zool.* **75**, 1553-1560. doi:10.1139/z97-782
- Lutterschmidt, W. I. and Hutchison, V. H.** (1997b). The critical thermal maximum: history and critique. *Can. J. Zool.* **75**, 1561-1574. doi:10.1139/z97-783
- MacLean, H. J., Sørensen, J. G., Kristensen, T. N., Loeschcke, V., Beedholm, K., Kellermann, V. and Overgaard, J.** (2019). Evolution and plasticity of thermal performance: an analysis of variation in thermal tolerance and fitness in 22 *Drosophila* species. *Philos. Trans. R. Soc. B Biol. Sci.* **374**, 20180548. doi:10.1098/rstb.2018.0548
- MacMillan, H. A. and Sinclair, B. J.** (2011). Mechanisms underlying insect chill-coma. *J. Insect Physiol.* **57**, 12-20. doi:10.1016/j.jinsphys.2010.10.004
- Marshall, K. E. and Sinclair, B. J.** (2012). The impacts of repeated cold exposure on insects. *J. Exp. Biol.* **215**, 1607-1613. doi:10.1242/jeb.059956
- Maynard Smith, J.** (1957). Temperature tolerance and acclimatization in *Drosophila subobscura*. *J. Exp. Biol.* **34**, 85-96. doi:10.1242/jeb.34.1.85
- Maynard Smith, J.** (1963). Temperature and the rate of ageing in poikilotherms. *Nature* **199**, 400-402. doi:10.1038/199400a0
- McMahon, R. F. and Ussery, T. A.** (1995). *Thermal tolerance of zebra mussels (Dreissena polymorpha) relative to rate of temperature increase and acclimation temperature*. Technical Report EL-95-10, U.S. Army Engineer Waterways Experiment Station, Vicksburg, MS.
- Mesas, A., Jaramillo, A. and Castañeda, L. E.** (2021). Experimental evolution on heat tolerance and thermal performance curves under contrasting thermal selection in *Drosophila subobscura*. *J. Evol. Biol.* **34**, 767-778.
- Michaelsen, J., Fago, A. and Bundgaard, A.** (2021). High temperature impairs mitochondrial function in rainbow trout cardiac mitochondria. *J. Exp. Biol.* **224**, jeb242382. doi:10.1242/jeb.242382
- Mitchell, K. A. and Hoffmann, A. A.** (2010). Thermal ramping rate influences evolutionary potential and species differences for upper thermal limits in *Drosophila*. *Funct. Ecol.* **24**, 694-700. doi:10.1111/j.1365-2435.2009.01666.x
- Munch, S. B. and Salinas, S.** (2009). Latitudinal variation in lifespan within species is explained by the metabolic theory of ecology. *PNAS* **106**, 13860-13864. doi:10.1073/pnas.0900300106
- Nedvěd, O., Lavy, D. and Verhoef, H. A.** (1998). Modelling the time-temperature relationship in cold injury and effect of high-temperature interruptions on survival in a chill-sensitive Collembolan. *Funct. Ecol.* **12**, 816-824. doi:10.1046/j.1365-2435.1998.00250.x
- Neven, L. G.** (2000). Physiological responses of insects to heat. *Postharvest Biol. Technol.* **21**, 103-111. doi:10.1016/S0925-5214(00)00169-1
- Orr, P. R.** (1955). Heat death. II. Differential response of entire animal (*Rana pipiens*) and several organ systems. *Physiol. Zool.* **28**, 294-302. doi:10.1086/physzool.28.4.30152191
- Overgaard, J., Kristensen, T. N. and Sørensen, J. G.** (2012). Validity of Thermal Ramping Assays Used to Assess Thermal Tolerance in Arthropods. *PLoS ONE* **7**, e32758. doi:10.1371/journal.pone.0032758
- Overgaard, J., Kearney, M. R. and Hoffmann, A. A.** (2014). Sensitivity to thermal extremes in Australian *Drosophila* implies similar impacts of climate change on the distribution of widespread and tropical species. *Glob. Change Biol.* **20**, 1738-1750. doi:10.1111/gcb.12521
- Overgaard, J., Gerber, L. and Andersen, M. K.** (2021). Osmoregulatory capacity at low temperature is critical for insect cold tolerance. *Curr. Opin. Insect Sci.* **47**, 38-45. doi:10.1016/j.cois.2021.02.015
- Parmesan, C.** (2006). Ecological and evolutionary responses to recent climate change. *Annu. Rev. Ecol. Syst.* **37**, 637-671. doi:10.1146/annurev.ecolsys.37.091305.110100
- Parratt, S. R., Walsh, B. S., Metelmann, S., White, N., Manser, A., Bretman, A. J., Hoffmann, A. A., Snook, R. R. and Price, T. A. R.** (2021). Temperatures that sterilize males better match global species distributions than lethal temperatures. *Nat. Clim. Chang.* **11**, 481-484. doi:10.1038/s41558-021-01047-0
- Parsell, D. A. and Lindquist, S.** (1993). The function of heat-shock proteins in stress tolerance: degradation and reactivation of damaged proteins. *Annu. Rev. Genet.* **27**, 437-496. doi:10.1146/annurev.ge.27.120193.002253
- Peck, L. S., Clark, M. S., Morley, S. A., Massey, A. and Rossetti, H.** (2009). Animal temperature limits and ecological relevance: effects of size, activity and rates of change. *Funct. Ecol.* **23**, 248-256. doi:10.1111/j.1365-2435.2008.01537.x
- Pinsky, M. L., Eikeset, A. M., McCauley, D. J., Payne, J. L. and Sunday, J. M.** (2019). Greater vulnerability to warming of marine versus terrestrial ectotherms. *Nature* **569**, 108-111. doi:10.1038/s41586-019-1132-4
- Pörtner, H.-O.** (2001). Climate change and temperature-dependent biogeography: oxygen limitation of thermal tolerance in animals. *Naturwissenschaften* **88**, 137-146. doi:10.1007/s001140100216
- Pörtner, H.-O. and Farrell, A. P.** (2008). Physiology and climate change. *Science* **322**, 690-692. doi:10.1126/science.1163156
- Rahmstorf, S. and Coumou, D.** (2011). Increase of extreme events in a warming world. *Proc. Natl Acad. Sci. USA* **108**, 17905-17909. doi:10.1073/pnas.1101766108
- Rezende, E. L., Tejedo, M. and Santos, M.** (2011). Estimating the adaptive potential of critical thermal limits: methodological problems and evolutionary implications. *Funct. Ecol.* **25**, 111-121. doi:10.1111/j.1365-2435.2010.01778.x
- Rezende, E. L., Castañeda, L. E. and Santos, M.** (2014). Tolerance landscapes in thermal ecology. *Funct. Ecol.* **28**, 799-809. doi:10.1111/1365-2435.12268
- Richard, J., Morley, S. A., Thorne, M. A. S. and Peck, L. S.** (2012). Estimating long-term survival temperatures at the assemblage level in the marine environment: towards macrophysiology. *PLoS One* **7**, e34655. doi:10.1371/journal.pone.0034655
- Ritossa, F.** (1962). A new puffing pattern induced by temperature shock and DNP in *Drosophila*. *Experientia* **18**, 571-573. doi:10.1007/BF02172188
- Robertson, R. M., Dawson-Scully, K. D. and Andrew, R. D.** (2020). Neural shutdown under stress: an evolutionary perspective on spreading depolarization. *J. Neurophysiol.* **123**, 885-895. doi:10.1152/jn.00724.2019
- Salt, R. W.** (1966). Relation between time of freezing and temperature in supercooled larvae of *Cephus cinctus* nort. *Can. J. Zool.* **44**, 947-952. doi:10.1139/z66-096
- Santos, M., Castañeda, L. E. and Rezende, E. L.** (2011). Making sense of heat tolerance estimates in ectotherms: Lessons from *Drosophila*. *Funct. Ecol.* **25**, 1169-1180. doi:10.1111/j.1365-2435.2011.01908.x
- Schmidt-Nielsen, K.** (1997). *Animal Physiology. Adaptation and Environment*, 4th edn. Cambridge: Cambridge University Press.
- Schulte, P. M., Healy, T. M. and Fanguie, N. A.** (2011). Thermal performance curves, phenotypic plasticity, and the time scales of temperature exposure. *Integr. Comp. Biol.* **51**, 691-702. doi:10.1093/icb/ibr097
- Seebacher, F., White, C. R. and Franklin, C. E.** (2014). Physiological plasticity increases resilience of ectothermic animals to climate change. *Nat. Clim. Change* **5**, 61-66. doi:10.1038/nclimate2457
- Seneviratne, S. I., Donat, M. G., Mueller, B. and Alexander, L. V.** (2014). No pause in the increase of hot temperature extremes. *Nat. Clim. Change* **4**, 161-163. doi:10.1038/nclimate2145
- Sgrò, C. M., Overgaard, J., Kristensen, T. N., Mitchell, K. A., Cockerell, F. E. and Hoffmann, A. A.** (2010). A comprehensive assessment of geographic variation in heat tolerance and hardening capacity in populations of *Drosophila melanogaster* from eastern Australia. *J. Evol. Biol.* **23**, 2484-2493. doi:10.1111/j.1420-9101.2010.02110.x
- Shaw, R. F. and Bercaw, B. L.** (1962). Temperature and life-span in poikilothermous animals. *Nature* **196**, 454-457. doi:10.1038/196454a0
- Sinclair, B. J., Marshall, K. E., Sewell, M. A., Levesque, D. L., Willett, C. S., Slotsbo, S., Dong, Y., Harley, C. D. G., Marshall, D. J., Helmuth, B. S. et al.** (2016). Can we predict ectotherm responses to climate change using thermal performance curves and body temperatures? *Ecol. Lett.* **19**, 1372-1385. doi:10.1111/ele.12686
- Somero, G. N., Lockwood, B. and Tomanek, L.** (2017). *Biochemical Adaptation: Response to Environmental Challenges, from Life's Origins to the Anthropocene*. Sinauer.
- Sørensen, J. G., Kristensen, T. N. and Loeschcke, V.** (2003). The evolutionary and ecological role of heat shock proteins. *Ecol. Lett.* **6**, 1025-1037. doi:10.1046/j.1461-0248.2003.00528.x
- Sørensen, J. G., Loeschcke, V. and Kristensen, T. N.** (2013). Cellular damage as induced by high temperature is dependent on rate of temperature change - investigating consequences of ramping rates on molecular and organismal phenotypes in *Drosophila melanogaster*. *J. Exp. Biol.* **216**, 809-814. doi:10.1242/jeb.076356
- Speights, C. J., Harmon, J. P. and Barton, B. T.** (2017). Contrasting the potential effects of daytime versus nighttime warming on insects. *Current Opinion in Insect Science* **23**, 1-6. doi:10.1016/j.cois.2017.06.005
- Spong, K. E., Andrew, R. D. and Robertson, R. M.** (2016). Mechanisms of spreading depolarization in vertebrate and insect central nervous systems. *J. Neurophysiol.* **116**, 1117-1127. doi:10.1152/jn.00352.2016
- Stoks, R., Verheyen, J., Van Dievel, M. and Tüzün, N.** (2017). Daily temperature variation and extreme high temperatures drive performance and biotic interactions

- in a warming world. *Current Opinion in Insect Science* **23**, 35–42. doi:10.1016/j.cois.2017.06.008
- Sunday, J. M., Bates, A. E. and Dulvy, N. K.** (2011). Global analysis of thermal tolerance and latitude in ectotherms. *Proc. R. Soc. B* **278**, 1823–1830. doi:10.1098/rspb.2010.1295
- Sunday, J. M., Bates, A. E. and Dulvy, N. K.** (2012). Thermal tolerance and the global redistribution of animals. *Nat. Clim. Change* **2**, 686–690. doi:10.1038/nclimate1539
- Sunday, J., Bennett, J. M., Calosi, P., Clusella-Trullas, S., Gravel, S., Hargreaves, A. L., Leiva, F. P., Verberk, W. C. E. P., Olalla-Tárraga, M. Á. and Morales-Castilla, I.** (2019). Thermal tolerance patterns across latitude and elevation. *Philos. Trans. R. Soc. B Biol. Sci.* **374**, 20190036. doi:10.1098/rstb.2019.0036
- Tarapacki, P., Jørgensen, L. B., Sørensen, J. G., Andersen, M. K., Colinet, H. and Overgaard, J.** (2021). Acclimation, duration and intensity of cold exposure determine the rate of cold stress accumulation and mortality in *Drosophila suzukii*. *J. Insect Physiol.* **135**, 104323. doi:10.1016/j.jinsphys.2021.104323
- Tattersall, G. J., Sinclair, B. J., Withers, P. C., Fields, P. A., Seebacher, F., Cooper, C. E. and Maloney, S. K.** (2012). Coping with thermal challenges: Physiological adaptations to environmental temperatures. *Comp. Physiol.* **2**, 2151–2202. doi:10.1002/cphy.c110055
- Terblanche, J. S., Deere, J. A., Clusella-Trullas, S., Janion, C. and Chown, S. L.** (2007). Critical thermal limits depend on methodological context. *Proc. Biol. Sci.* **274**, 2935–2942.
- Terblanche, J. S., Hoffmann, A. A., Mitchell, K. A., Rako, L., le Roux, P. C. and Chown, S. L.** (2011). Ecologically relevant measures of tolerance to potentially lethal temperatures. *J. Exp. Biol.* **214**, 3713–3725. doi:10.1242/jeb.061283
- Tomaneck, L.** (2010). Variation in the heat shock response and its implication for predicting the effect of global climate change on species' biogeographical distribution ranges and metabolic costs. *J. Exp. Biol.* **213**, 971–979. doi:10.1242/jeb.038034
- Ushakov, B.** (1964). Thermostability of cells and proteins of poikilotherms and its significance in speciation. *Physiol. Rev.* **44**, 518–560. doi:10.1152/physrev.1964.44.3.518
- van Heerwaarden, B. and Sgrò, C. M.** (2021). Male fertility thermal limits predict vulnerability to climate warming. *Nat. Commun.* **12**, 2214. doi:10.1038/s41467-021-22546-w
- Verberk, W. C. E. P., Overgaard, J., Ern, R., Bayley, M., Wang, T., Boardman, L. and Terblanche, J. S.** (2016). Does oxygen limit thermal tolerance in arthropods? A critical review of current evidence. *Comp. Biochem. Physiol. A Mol. Integr. Physiol.* **192**, 64–78. doi:10.1016/j.cbpa.2015.10.020
- Vornanen, M.** (2016). The temperature dependence of electrical excitability in fish hearts. *J. Exp. Biol.* **219**, 1941–1952. doi:10.1242/jeb.128439
- Vornanen, M.** (2020). Feeling the heat: source–sink mismatch as a mechanism underlying the failure of thermal tolerance. *J. Exp. Biol.* **223**, jeb225680. doi:10.1242/jeb.225680
- Willot, Q., Ørsted, M., Damsgaard, C. and Overgaard, J.** (2022). Thermal-death-time model as a tool to analyze heat-tolerance, acclimation, and biogeography in ants. *Myrmecological News* **32**, 127–138. doi:10.25849/myrmecol.news\_032:127
- Woodin, S. A., Hilbish, T. J., Helmuth, B., Jones, S. J. and Wethey, D. S.** (2013). Climate change, species distribution models, and physiological performance metrics: predicting when biogeographic models are likely to fail. *Ecol. Evol.* **3**, 3334–3346. doi:10.1002/ece3.680
